# Supplementary material for: Multimodal single-cell datasets characterize antigen-specific CD8+ T cells across SARS-CoV-2 vaccination and infection
Source: PubMed Central journal article supplement (PMC10522491; doi:10.1038/s41590-023-01608-9), 2023-09-21
Supplement: 41590_2023_1608_MOESM1_ESM.pdf [file 41590_2023_1608_MOESM1_ESM.pdf]

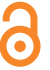

# Multimodal single-cell datasets characterize antigen-specific CD8<sup>+</sup> T cells across SARS-CoV-2 vaccination and infection

In the format provided by the authors and unedited

Supplemental Table 1

**Donors for CITE-seq / ASAP-seq (Figures 1-2)**

|         | <b>Donor ID</b> | <b>Age</b> | <b>Gender</b> | <b>Race</b>     | <b>Ethnicity</b>       |
|---------|-----------------|------------|---------------|-----------------|------------------------|
| Batch 1 | <b>A</b>        | <b>23</b>  | Female        | Native American | Hispanic/Latino        |
| Batch 1 | <b>E</b>        | <b>17</b>  | Female        | Native American | Hispanic/Latino        |
| Batch 1 | <b>F</b>        | <b>26</b>  | Female        | Not reported    | Not reported           |
| Batch 2 | <b>B</b>        | <b>20</b>  | Female        | Not reported    | Not of Hispanic origin |
| Batch 2 | <b>J</b>        | <b>21</b>  | Male          | Not reported    | Not of Hispanic origin |
| Batch 2 | <b>M</b>        | <b>24</b>  | Female        | Not reported    | Not of Hispanic origin |

**Donors for ECCITE-Seg (Figure 3)**

|         | <b>Donor ID</b> | <b>Age</b> | <b>Gender</b> | <b>Race</b>     | <b>Ethnicity</b>       |
|---------|-----------------|------------|---------------|-----------------|------------------------|
| Batch 1 | <b>A</b>        | <b>23</b>  | Female        | Native American | Hispanic/Latino        |
| Batch 1 | <b>E</b>        | <b>17</b>  | Female        | Native American | Hispanic/Latino        |
| Batch 1 | <b>P</b>        | <b>31</b>  | Female        | Not reported    | Not reported           |
| Batch 1 | <b>D16</b>      | <b>53</b>  | Male          | White           | Not of Hispanic origin |
| Batch 2 | <b>D40</b>      | <b>29</b>  | Female        | White           | Not of Hispanic origin |
| Batch 2 | <b>D87</b>      | <b>57</b>  | Male          | White           | Not of Hispanic origin |
| Batch 2 | <b>D93</b>      | <b>33</b>  | Female        | White           | Not of Hispanic origin |
| Batch 2 | <b>D95</b>      | <b>58</b>  | Female        | Not reported    | Not reported           |
| Batch 2 | <b>P</b>        | <b>31</b>  | Female        | Not reported    | Not reported           |
| Batch 2 | <b>D16</b>      | <b>53</b>  | Male          | White           | Not of Hispanic origin |

Supplementary table 2

| Total-seq A | Description                     | Clone    | Barcode          | Gene Name |
|-------------|---------------------------------|----------|------------------|-----------|
| A0006       | anti-human CD86                 | IT2.2    | GTCTTTGTCAGTGCA  | CD86      |
| A0007       | anti-human CD274 (B7-H1, PD-L1) | 29E.2A3  | GTTGTCCGACAATAC  | CD274     |
| A0020       | anti-human CD270 (HVEM, TR2)    | 122      | TGATAGAAACAGACC  | TNFRSF14  |
| A0023       | anti-human CD155 (PVR)          | SKII.4   | ATCACATCGTTGCCA  | PVR       |
| A0024       | anti-human CD112 (Nectin-2)     | TX31     | AACCTTCCGTCTAAG  | NECTIN2   |
| A0026       | anti-human CD47                 | CC2C6    | GCATTCTGTCACCTA  | CD47      |
| A0029       | anti-human CD48                 | BJ40     | CTACGACGTAGAAGA  | CD48      |
| A0031       | anti-human CD40                 | 5C3      | CTCAGATGGAGTATG  | CD40      |
| A0032       | anti-human CD154                | 24-31    | GCTAGATAGATGCAA  | CD40LG    |
| A0033       | anti-human CD52                 | HI186    | CTTTGTACGAGCAAA  | CD52      |
| A0034       | anti-human CD3                  | UCHT1    | CTCATTGTAACCTCT  | CD3D      |
| A0046       | anti-human CD8                  | SK1      | GCGCAACTTGATGAT  | CD8A      |
| A0047       | anti-human CD56 (NCAM)          | 5.1H11   | TCCTTTCCTGATAGG  | NCAM1     |
| A0050       | anti-human CD19                 | HIB19    | CTGGGCAATTACTCG  | CD19      |
| A0052       | anti-human CD33                 | P67.6    | TAACTCAGGGCCTAT  | CD33      |
| A0053       | anti-human CD11c                | S-HCL-3  | TACGCCATAAAGTTG  | ITGAX     |
| A0058       | anti-human HLA-A,B,C            | W6/32    | TATGCGAGGCTTATC  | HLA-A     |
| A0063       | anti-human CD45RA               | HI100    | TCAATCCTTCCGCTT  | PTPRC     |
| A0064       | anti-human CD123                | 6H6      | CTTCACTCTGTCAGG  | IL3RA     |
| A0066       | anti-human CD7                  | CD7-6B7  | TGGATTCCCGGACTT  | CD7       |
| A0070       | anti-human/mouse CD49f          | GoH3     | TTCCGAGGATGATCT  | ITGA6     |
| A0071       | anti-human CD194 (CCR4)         | L291H4   | AGCTTACCTGCACGA  | CCR4      |
| A0072       | anti-human CD4                  | RPA-T4   | TGTTCCCGCTCAACT  | CD4       |
| A0073       | anti-mouse/human CD44           | IM7      | TGGCTTCAGGTCCCTA | CD44      |
| A0081       | anti-human CD14                 | M5E2     | TCTCAGACCTCCGTA  | CD14      |
| A0083       | anti-human CD16                 | 3G8      | AAGTTCACCTCTTTGC | FCGR3A    |
| A0085       | anti-human CD25                 | BC96     | TTTGTCTGTACGCC   | IL2RA     |
| A0087       | anti-human CD45RO               | UCHL1    | CTCCGAATCATGTTG  | PTPRC     |
| A0088       | anti-human CD279 (PD-1)         | EH12.2H7 | ACAGCGCCGTATTTA  | PDCD1     |
| A0089       | anti-human TIGIT (VSTM3)        | A15153G  | TTGCTTACCGCCAGA  | TIGIT     |
| A0090       | Mouse IgG1, κ isotype Ctrl      | MOPC-21  | GCCGGACGACATTAA  |           |
| A0091       | Mouse IgG2a, κ isotype Ctrl     | MOPC-173 | CTCCTACCTAAACTG  |           |

|       |                                   |                |                  |         |
|-------|-----------------------------------|----------------|------------------|---------|
| A0092 | Mouse IgG2b, κ isotype Ctrl       | MPC-11         | ATATGTATCACGCGA  |         |
| A0095 | Rat IgG2b, κ Isotype Ctrl         | RTK4530        | GATTCTTGACGACCT  |         |
| A0100 | anti-human CD20                   | 2H7            | TTCTGGGTCCCTAGA  | MS4A1   |
| A0101 | anti-human CD335 (NKp46)          | 9E2            | ACAATTTGAACAGCG  | NCR1    |
| A0124 | anti-human CD31                   | WM59           | ACCTTTATGCCACGG  | PECAM1  |
| A0127 | anti-Human Podoplanin             | NC-08          | GGTTACTCGTTGTGT  | PDPN    |
| A0134 | anti-human CD146                  | P1H12          | CCTTGATAACATCA   | MCAM    |
| A0136 | anti-human IgM                    | MHM-88         | TAGCGAGCCCGTATA  | IGHM    |
| A0138 | anti-human CD5                    | UCHT2          | CATTAACGGGATGCC  | CD5     |
| A0140 | anti-human CD183 (CXCR3)          | G025H7         | GCGATGGTAGATTAT  | CXCR3   |
| A0141 | anti-human CD195 (CCR5)           | J418F1         | CCAAAGTAAGAGCCA  | CCR5    |
| A0142 | anti-human CD32                   | FUN-2          | GCTTCCGAATTACCG  | FCGR2A  |
| A0143 | anti-human CD196 (CCR6)           | G034E3         | GATCCCTTTGTCACT  | CCR6    |
| A0144 | anti-human CD185 (CXCR5)          | J252D4         | AATTCAACCGTCGCC  | CXCR5   |
| A0145 | Hu CD103 (Integrin αE)            | Ber-ACT8       | GACCTCATTGTGAAT  | ITGAE   |
| A0146 | anti-human CD69                   | FN50           | GTCTCTTGGCTTAAA  | CD69    |
| A0147 | anti-human CD62L                  | DREG-56        | GTCCCTGCAACTTGA  | SELL    |
| A0149 | anti-human CD161                  | HP-3G10        | GTACGCAGTCCTTCT  | KLRB1   |
| A0151 | anti-human CD152 (CTLA-4)         | BNI3           | ATGGTTCACGTAATC  | CTLA4   |
| A0152 | anti-human CD223 (LAG-3)          | 11C3C65        | CATTTGTCTGCCGGT  | LAG3    |
| A0153 | anti-human KLRG1 (MAFA)           | SA231A2        | CTTATTTCCCTGCCCT | KLRG1   |
| A0154 | anti-human CD27                   | O323           | GCACTCCTGCATGTA  | CD27    |
| A0155 | anti-human CD107a (LAMP-1)        | H4A3           | CAGCCCACTGCAATA  | LAMP1   |
| A0156 | anti-human CD95 (Fas)             | DX2            | CCAGCTCATTAGAGC  | FAS     |
| A0158 | anti-human CD134 (OX40)           | er-ACT35 (ACT3 | AACCCACCGTTGTTA  | TNFRSF4 |
| A0159 | anti-human HLA-DR                 | L243           | AATAGCGAGCAAGTA  | HLA-DRA |
| A0160 | anti-human CD1c                   | L161           | GAGCTACTTCACTCG  | CD1C    |
| A0161 | anti-human CD11b                  | ICRF44         | GACAAGTGATCTGCA  | ITGAM   |
| A0162 | anti-human CD64                   | 10.1           | AAGTATGCCCTACGA  | FCGR1A  |
| A0163 | anti-human CD141 (Thrombomodulin) | M80            | GGATAACCGCGCTTT  | THBD    |
| A0165 | Hu CD314 (NKG2D)                  | 1D11           | CGTGTTTGTTCCTCA  | KLRK1   |
| A0167 | anti-human CD35                   | E11            | ACTTCCGTCGATCTT  | CR1     |
| A0168 | anti-human CD57 Recombinant       | QA17A04        | AACTCCCTATGGAGG  | B3GAT1  |

|       |                                           |                |                  |           |
|-------|-------------------------------------------|----------------|------------------|-----------|
| A0170 | anti-human CD272 (BTLA)                   | MIH26          | GTTATTGGACTAAGG  | BTLA      |
| A0171 | anti-human/mouse/rat CD278 (ICOS)         | C398.4A        | CGCGCACCCATTAAA  | ICOS      |
| A0172 | anti-human CD275 (B7-H2, B7-RP1, ICOSL)   | 9F.8A4         | GTTAGTGTTAGCTTG  | ICOSLG    |
| A0174 | anti-human CD58 (LFA-3)                   | TS2/9          | GTTCCCTATGGACGAC | CD58      |
| A0176 | anti-human CD39                           | A1             | TTACCTGGTATCCGT  | ENTPD1    |
| A0179 | anti-human CX3CR1                         | K0124E1        | AGTATCGTCTCTGGG  | CX3CR1    |
| A0180 | anti-human CD24                           | ML5            | AGATTCCCTTCGTGTT | CD24      |
| A0181 | anti-human CD21                           | Bu32           | AACCTAGTAGTTCGG  | CR2       |
| A0185 | anti-human CD11a                          | TS2/4          | TATATCCTTGTGAGC  | ITGAL     |
| A0187 | anti-human CD79b (Igβ)                    | CB3-1          | ATTCTTCAACCGAAG  | CD79B     |
| A0189 | anti-human CD244 (2B4)                    | C1.7           | TCGCTTGGATGGTAG  | CD244     |
| A0206 | anti-human CD169 (Sialoadhesin, Siglec-1) | 7-239          | TACTCAGCGTGTTTG  | SIGLEC1   |
| A0214 | anti-human/mouse integrin β7              | FIB504         | TCCTTGGATGTACCG  | ITGB7     |
| A0215 | anti-human CD268 (BAFF-R)                 | 11C1           | CGAAGTCGATCCGTA  | TNFRSF13C |
| A0216 | anti-human CD42b                          | HIP1           | TCCTAGTACCGAAGT  | GP1BB     |
| A0217 | anti-human CD54                           | HA58           | CTGATAGACTTGAGT  | ICAM1     |
| A0218 | anti-human CD62P (P-Selectin)             | AK4            | CCTTCCGTATCCCTT  | SELP      |
| A0219 | anti-human CD119 (IFN-γ R α chain)        | GIR-208        | TGTGTATTCCCTTGT  | IFNGR1    |
| A0224 | anti-human TCR α/β                        | IP26           | CGTAACGTAGAGCGA  |           |
| A0236 | Rat IgG1, κ isotype Ctrl                  | RTK2071        | ATCAGATGCCCTCAT  |           |
| A0237 | Rat IgG1, λ Isotype Ctrl                  | G0114F7        | GGGAGCGATTCAACT  |           |
| A0238 | Rat IgG2a, κ Isotype Ctrl                 | RTK2758        | AAGTCAGGTTTCGTTT |           |
| A0240 | Rat IgG2c, κ Isotype Ctrl                 | RTK4174        | TCCAGGCTAGTCATT  |           |
| A0241 | Armenian Hamster IgG Isotype Ctrl         | HTK888         | CCTGTCATTAAGACT  |           |
| A0242 | anti-human CD192 (CCR2)                   | K036C2         | GAGTTCCCTTACCTG  | CCR2      |
| A0246 | anti-human CD122 (IL-2Rβ)                 | TU27           | TCATTTCCCTCCGATT | IL2RB     |
| A0247 | anti-human CD267 (TACI)                   | 1A1            | AGTGATGGAGCGAAC  | TNFRSF13B |
| A0352 | anti-human FcεR1α                         | AER-37 (CRA-1) | CTCGTTTCCGTATCG  | FCER1A    |
| A0353 | anti-human CD41                           | HIP8           | ACGTTGTGGCCTTGT  | ITGA2B    |
| A0355 | anti-human CD137 (4-1BB)                  | 4B4-1          | CAGTAAGTTCGGGAC  | TNFRSF9   |
| A0357 | anti-human CD43                           | CD43-10G7      | GATTAACCAGCTCAT  | SPN       |
| A0358 | anti-human CD163                          | GHI/61         | GCTTCTCCTTCCTTA  | CD163     |
| A0359 | anti-human CD83                           | HB15e          | CCACTCATTTCCGGT  | CD83      |

|       |                                        |           |                  |         |
|-------|----------------------------------------|-----------|------------------|---------|
| A0364 | anti-human CD13                        | WM15      | TTTCAACGCCCTTTC  | ANPEP   |
| A0367 | anti-human CD2                         | TS1/8     | TACGATTTGTCAGGG  | CD2     |
| A0368 | anti-human CD226 (DNAM-1)              | 11A8      | TCTCAGTGTTTGTGG  | CD226   |
| A0369 | anti-human CD29                        | TS2/16    | GTATTCCCTCAGTCA  | ITGB1   |
| A0370 | anti-human CD303 (BDCA-2)              | 201A      | GAGATGTCCGAATTT  | CLEC4C  |
| A0371 | anti-human CD49b                       | P1E6-C5   | GCTTTCTTCAGTATG  | ITGA2   |
| A0372 | anti-human CD61                        | VI-PL2    | AGGTTGGAGTAGACT  | ITGB3   |
| A0373 | anti-human CD81 (TAPA-1)               | 5A6       | GTATCCTTCCTTGGC  | CD81    |
| A0383 | anti-human CD55                        | JS11      | GCTCATTACCCATTA  | CD55    |
| A0384 | anti-human IgD                         | IA6-2     | CAGTCTCCGTAGAGT  | IGHD    |
| A0385 | anti-human CD18                        | TS1/18    | TATTGGGACACTTCT  | ITGB2   |
| A0386 | anti-human CD28                        | CD28.2    | TGAGAACGACCCTAA  | CD28    |
| A0389 | anti-human CD38                        | HIT2      | TGTACCCGCTTGTGA  | CD38    |
| A0390 | anti-human CD127 (IL-7R $\alpha$ )     | A019D5    | GTGTGTTGTCCTATG  | IL7R    |
| A0391 | anti-human CD45                        | HI30      | TGCAATTACCCGGAT  | PTPRC   |
| A0393 | anti-human CD22                        | S-HCL-1   | GGGTTGTTGTCTTTG  | CD22    |
| A0394 | anti-human CD71                        | CY1G4     | CCGTGTTCCCTCATTA | TFRC    |
| A0396 | anti-human CD26                        | BA5b      | GGTGGCTAGATAATG  | DPP4    |
| A0398 | anti-human CD115 (CSF-1R)              | 9-4D2-1E4 | AATCACGGTCCTTGT  | CSF1R   |
| A0404 | anti-human CD63                        | H5C6      | GAGATGTCTGCAACT  | CD63    |
| A0406 | anti-human CD304 (Neuropilin-1)        | 12C2      | GGACTAAGTTTCGTT  | NRP1    |
| A0407 | anti-human CD36                        | 5-271     | TTCTTTGCCTTGCCA  | CD36    |
| A0408 | anti-human CD172a (SIRP $\alpha$ )     | 15-414    | CGTGTTTAACTTGAG  | SIRPA   |
| A0419 | anti-human CD72                        | 3F3       | CAGTCGTGGTAGATA  | CD72    |
| A0420 | anti-human CD158 (KIR2DL1/S1/S3/S5)    | HP-MA4    | TATCAACCAACGCTT  | KIR2DL1 |
| A0446 | anti-human CD93                        | VIMD2     | GCGCTACTTCCTTGA  | CD93    |
| A0447 | anti-human CD200 (OX2)                 | OX-104    | CACGTAGACCTTTGC  | CD200   |
| A0575 | anti-human CD49a                       | TS2/7     | ACTGATGGACTCAGA  | ITGA1   |
| A0576 | anti-human CD49d                       | 9F10      | CCATTCAACTTCCGG  | ITGA4   |
| A0577 | anti-human CD73 (Ecto-5'-nucleotidase) | AD2       | CAGTTCCTCAGTTCG  | NT5E    |
| A0579 | anti-human CD9                         | HI9a      | GAGTCACCAATCTGC  | CD9     |
| A0581 | anti-human TCR V $\alpha$ 7.2          | 3C10      | TACGAGCAGTATTCA  |         |
| A0582 | anti-human TCR V $\delta$ 2            | B6        | TCAGTCAGATGGTAT  |         |

|       |                                    |           |                  |         |
|-------|------------------------------------|-----------|------------------|---------|
| A0586 | anti-human CD354 (TREM-1)          | TREM-26   | TAGCCGTTTCCTTTG  | TREM1   |
| A0590 | anti-human CD305 (LAIR1)           | NKTA255   | ATTTCCATTCCCTGT  | LAIR1   |
| A0591 | anti-human LOX-1                   | 15C4      | ACCCTTTACCGAATA  | OLR1    |
| A0599 | anti-human CD158e1 (KIR3DL1, NKB1) | DX9       | GGACGCTTTCCTTGA  | KIR3DL1 |
| A0817 | anti-human CD109                   | W7C5      | CACTTAACCTCTGGGT | CD109   |
| A0822 | anti-human CD142                   | NY2       | CACTGCCGTCGATTA  | F3      |
| A0830 | anti-human CD319 (CRACC)           | 162.1     | AGTATGCCATGTCTT  | SLAMF7  |
| A0845 | anti-human CD99                    | 3B2/TA8   | ACCCGTCCCTAAGAA  | CD99    |
| A0853 | anti-human CLEC12A                 | 50C1      | CATTAGAGTCTGCCA  | CLEC12A |
| A0861 | anti-human CD151 (PETA-3)          | 50-6      | CTTACCTAGTCATTC  | CD151   |
| A0864 | anti-human CD352 (NTB-A)           | NT-7      | AGTTTCCACTCAGGC  | SLAMF6  |
| A0866 | anti-human CLEC1B (CLEC2)          | AYP1      | TGCCAGTATCACGTA  | CLEC1B  |
| A0867 | anti-human CD94                    | DX22      | CTTTCCGGTCTTACA  | KLRD1   |
| A0868 | anti-human IgE                     | MHE-18    | GGATGTACCGCGTAT  | IGHE    |
| A0870 | anti-human CD150 (SLAM)            | A12 (7D4) | GTCATTGTATGTCTG  | SLAMF1  |
| A0871 | anti-human CD162                   | KPL-1     | ATATGTCAGAGCACC  | SELPLG  |
| A0872 | anti-human CD84                    | CD84.1.21 | CTCCCTAGTTCCCTTT | CD84    |
| A0894 | anti-human Ig light chain κ        | MHK-49    | AGCTCAGCCAGTATG  | IGKC    |
| A0896 | anti-human CD85j (ILT2)            | GHI/75    | CCTTGTGAGGCTATG  | LILRB1  |
| A0897 | anti-human CD23                    | EBVCS-5   | TCTGTATAACCGTCT  | FCER2   |
| A0898 | anti-human Ig light chain λ        | MHL-38    | CAGCCAGTAAGTCAC  |         |
| A0902 | anti-human CD328 (Siglec-7)        | 6-434     | CTTAGCATTTCACTG  | SIGLEC7 |
| A0912 | anti-human GPR56                   | CG4       | GCCTAGTTTCCGTTT  | ADGRG1  |
| A0920 | anti-human CD82                    | ASL-24    | TCCCACTTCCGCTTT  | CD82    |
| A0923 | anti-human NKp80                   | 5D12      | TATAGTTCCTCTGTG  | KLRF1   |
| A0931 | anti-human CD131                   | 1C1       | CTGCATGAGACCAAA  | CSF2RB  |
| A0935 | anti-human CD74                    | LN2       | CTGTAGCATTTCCCT  | CD74    |
| A0940 | anti-human CD116                   | 4H1       | ATGGACAGTTCGTGT  | CSF2RA  |
| A0941 | anti-human CD37                    | M-B371    | ACAGTCACTGGGCAA  | CD37    |
| A0944 | anti-human CD101 (BB27)            | BB27      | CTACTTCCCTGTCAA  | CD101   |
| A1018 | anti-human HLA-DR, DP, DQ          | Tü39      | AGCTACGAGCAGTAG  | HLA-DRA |
| A1046 | anti-human CD88 (C5aR)             | S5/1      | GCCGCATGAGAAACA  | C5AR1   |
|       | CD110                              | S16017E   | TGTTGTAAGATGCCA  |         |

|              |          |                  |
|--------------|----------|------------------|
| GP130        | 2E1B02   | CACGAGAATTTTCAGT |
| CD337        | P30-15   | AAAGTCACTCTGCCG  |
| CD271        | ME20.4   | AACCGCGCTTCAGAT  |
| CD34         | 581      | GCAGAAATCTCCCTT  |
| CD117        | 104D2    | AGACTAATAGCTGAC  |
| CD1d         | 51.1     | TCGAGTCGCTTATCA  |
| CD126        | UV4      | TGATGGGAGCTTATC  |
| CD307e       | 509f6    | TCACGCAGTCCTCAA  |
| CD307c/FcRL3 | H5/FcRL3 | GCCTAGTTTGAACGC  |



| Total-seq C | Description                     | Clone    | Barcode          |
|-------------|---------------------------------|----------|------------------|
| C0006       | anti-human CD86                 | IT2.2    | GTCTTTGTCAGTGCA  |
| C0007       | anti-human CD274 (B7-H1, PD-L1) | 29E.2A3  | GTTGTCCGACAATAC  |
| C0020       | anti-human CD270 (HVEM, TR2)    | 122      | TGATAGAAACAGACC  |
| C0023       | anti-human CD155 (PVR)          | SKII.4   | ATCACATCGTTGCCA  |
| C0024       | anti-human CD112 (Nectin-2)     | TX31     | AACCTTCCGTCTAAG  |
| C0026       | anti-human CD47                 | CC2C6    | GCATTCTGTCACCTA  |
| C0029       | anti-human CD48                 | BJ40     | CTACGACGTAGAAGA  |
| C0031       | anti-human CD40                 | 5C3      | CTCAGATGGAGTATG  |
| C0032       | anti-human CD154                | 24-31    | GCTAGATAGATGCAA  |
| C0033       | anti-human CD52                 | HI186    | CTTTGTACGAGCAAA  |
| C0034       | anti-human CD3                  | UCHT1    | CTCATTGTAACTCT   |
| C0046       | anti-human CD8                  | SK1      | GCGCAACTTGATGAT  |
| C0047       | anti-human CD56                 | 5.1H11   | TCCTTTCCTGATAGG  |
| C0050       | anti-human CD19                 | HIB19    | CTGGGCAATTACTION |
| C0052       | anti-human CD33                 | P67.6    | TAACTCAGGGCCTAT  |
| C0053       | anti-human CD11c                | S-HCL-3  | TACGCCTATAACTTG  |
| C0058       | anti-human HLA-A,B,C            | W6/32    | TATGCGAGGCTTATC  |
| C0063       | anti-human CD45RA               | HI100    | TCAATCCTCCGCTT   |
| C0064       | anti-human CD123                | 6H6      | CTTCACTCTGTCAGG  |
| C0066       | anti-human CD7                  | CD7-6B7  | TGGATTCCCGGACTT  |
| C0068       | anti-human CD105                | 43A3     | ATCGTCGAGAGCTAG  |
| C0070       | anti-human/mouse CD49f          | GoH3     | TTCCGAGGATGATCT  |
| C0071       | anti-human CD194 (CCR4)         | L291H4   | AGCTTACCTGCACGA  |
| C0072       | anti-human CD4                  | RPA-T4   | TGTTCCCGCTCAACT  |
| C0073       | anti-mouse/human CD44           | IM7      | TGGCTTCAGGTCCTA  |
| C0081       | anti-human CD14                 | M5E2     | TCTCAGACCTCCGTA  |
| C0083       | anti-human CD16                 | 3G8      | AAGTTCACTCTTTGC  |
| C0085       | anti-human CD25                 | BC96     | TTTGTCTGTACGCC   |
| C0087       | anti-human CD45RO               | UHL1     | CTCCGAATCATGTTG  |
| C0088       | anti-human CD279                | EH12.2H7 | ACAGCGCCGTATTTA  |
| C0089       | anti-human TIGIT (VSTM3)        | A15153G  | TTGCTTACCGCCAGA  |
| C0090       | Mouse IgG1, κ isotype Ctrl      | MOPC-21  | GCCGACGACATTAA   |
| C0091       | Mouse IgG2a, κ isotype Ctrl     | MOPC-173 | CTCCTACCTAACTG   |
| C0092       | Mouse IgG2b, κ isotype Ctrl     | MPC-11   | ATATGTATCACGCGA  |
| C0095       | Rat IgG2b, κ Isotype Ctrl       | RTK4530  | GATTCTTGACGACCT  |
| C0100       | anti-human CD20                 | 2H7      | TTCTGGGTCCCTAGA  |
| C0101       | anti-human CD335 (NKp46)        | 9E2      | ACAATTTGAACAGCG  |
| C0124       | anti-human CD31                 | WM59     | ACCTTTATGCCACGG  |
| C0134       | anti-human CD146                | P1H12    | CCTTGGATAACATCA  |
| C0136       | anti-human IgM                  | MHM-88   | TAGCGAGCCCGTATA  |
| C0138       | anti-human CD5                  | UCHT2    | CATTAACGGGATGCC  |
| C0140       | anti-human CD183 (CXCR3)        | G025H7   | GCGATGGTAGATTAT  |
| C0141       | anti-human CD195 (CCR5)         | J418F1   | CAAAGTAAGAGCCA   |
| C0142       | anti-human CD32                 | FUN-2    | GCTCCGAATTACCG   |

|       |                                                   |             |                  |
|-------|---------------------------------------------------|-------------|------------------|
| C0143 | anti-human CD196 (CCR6)                           | G034E3      | GATCCCTTTGCTACT  |
| C0144 | anti-human CD185 (CXCR5)                          | J252D4      | AATCAACCGTCGCC   |
| C0145 | anti-human CD103 (Integrin $\alpha$ E)            | Ber-ACT8    | GACCTCATTGTGAAT  |
| C0146 | anti-human CD69                                   | FN50        | GTCTCTGGCTTAAA   |
| C0147 | anti-human CD62L                                  | DREG-56     | GTCCCTGCAACTGA   |
| C0149 | anti-human CD161                                  | HP-3G10     | GTACGCAGTCCTTCT  |
| C0151 | anti-human CD152 (CTLA-4)                         | BNI3        | ATGGTTCACGTAATC  |
| C0152 | anti-human CD223 (LAG-3)                          | 11C3C65     | CATTTGTCTGCCGGT  |
| C0153 | anti-human KLRG1 (MAFA)                           | SA231A2     | CTTATTTCTGCCCT   |
| C0154 | anti-human CD27                                   | O323        | GCACTCCTGCATGTA  |
| C0155 | anti-human CD107a (LAMP-1)                        | H4A3        | CAGCCCACTGCAATA  |
| C0156 | anti-human CD95 (Fas)                             | DX2         | CCAGCTCATTAGAGC  |
| C0158 | anti-human CD134 (OX40)                           | -ACT35 (ACT | AACCCACCGTTGTTA  |
| C0159 | anti-human HLA-DR                                 | L243        | AATAGCGAGCAAGTA  |
| C0160 | anti-human CD1c                                   | L161        | GAGCTACTTCACTCG  |
| C0161 | anti-human CD11b                                  | ICRF44      | GACAAGTGATCTGCA  |
| C0162 | anti-human CD64                                   | 10.1        | AAGTATGCCCTACGA  |
| C0163 | anti-human CD141 (Thrombomodulin)                 | M80         | GGATAACCGCGCTTT  |
| C0164 | anti-human CD1d                                   | 51.1        | TCGAGTCGCTTATCA  |
| C0165 | anti-human CD314 (NKG2D)                          | 1D11        | CGTGTTTGTTCCTCA  |
| C0167 | anti-human CD35                                   | E11         | ACTTCCGTCGATCTT  |
| C0168 | anti-human CD57 Recombinant                       | QA17A04     | AACTCCCTATGGAGG  |
| C0170 | anti-human CD272 (BTLA)                           | MIH26       | GTTATTGGACTAAGG  |
| C0171 | anti-human/mouse/rat CD278 (ICOS)                 | C398.4A     | CGCGCACCCATTAAA  |
| C0174 | anti-human CD58 (LFA-3)                           | TS2/9       | GTTCTATGGACGAC   |
| C0176 | anti-human CD39                                   | A1          | TTACCTGGTATCCGT  |
| C0179 | anti-human CX3CR1                                 | K0124E1     | AGTATCGTCTCTGGG  |
| C0180 | anti-human CD24                                   | ML5         | AGATTCCTTCGTGTT  |
| C0181 | anti-human CD21                                   | Bu32        | AACCTAGTAGTTCGG  |
| C0185 | anti-human CD11a                                  | TS2/4       | TATATCCTTGTGAGC  |
| C0187 | anti-human CD79b (Ig $\beta$ )                    | CB3-1       | ATTCTTCAACCGAAG  |
| C0189 | anti-human CD244 (2B4)                            | C1.7        | TCGCTTGGATGGTAG  |
| C0206 | anti-human CD169 (Sialoadhesin, Siglec-1          | 7-239       | TACTCAGCGTGTGTTG |
| C0214 | anti-human/mouse integrin $\beta$ 7               | FIB504      | TCCTTGGATGTACCG  |
| C0215 | anti-human CD268 (BAFF-R)                         | 11C1        | CGAAGTCGATCCGTA  |
| C0216 | anti-human CD42b                                  | HIP1        | TCCTAGTACCGAAGT  |
| C0217 | anti-human CD54                                   | HA58        | CTGATAGACTTGAGT  |
| C0218 | anti-human CD62P (P-Selectin)                     | AK4         | CCTTCCGTATCCCTT  |
| C0219 | anti-human CD119 (IFN- $\gamma$ R $\alpha$ chain) | GIR-208     | TGTGTATTCCCTTGT  |
| C0224 | anti-human TCR $\alpha/\beta$                     | IP26        | CGTAACGTAGAGCGA  |
| C0236 | Rat IgG1, $\kappa$ isotype Ctrl                   | RTK2071     | ATCAGATGCCCTCAT  |
| C0238 | Rat IgG2a, $\kappa$ Isotype Ctrl                  | RTK2758     | AAGTCAGGTCGTTT   |
| C0241 | Armenian Hamster IgG Isotype Ctrl                 | HTK888      | CCTGTCATTAAGACT  |
| C0246 | anti-human CD122 (IL-2R $\beta$ )                 | TU27        | TCATTTCTCCGATT   |
| C0247 | anti-human CD267 (TACI)                           | 1A1         | AGTGATGGAGCGAAC  |

|       |                                        |               |                  |
|-------|----------------------------------------|---------------|------------------|
| C0352 | anti-human FcεR1α                      | ER-37 (CRA-1) | CTCGTTTCCGTATCG  |
| C0353 | anti-human CD41                        | HIP8          | ACGTTGTGGCCTTGT  |
| C0355 | anti-human CD137 (4-1BB)               | 4B4-1         | CAGTAAGTTCGGGAC  |
| C0358 | anti-human CD163                       | GHI/61        | GCTTCTCCTTCCTTA  |
| C0359 | anti-human CD83                        | HB15e         | CCACTCATTTCGGT   |
| C0363 | anti-human CD124 (IL-4Rα)              | G077F6        | CCGTCCTGATAGATG  |
| C0364 | anti-human CD13                        | WM15          | TTTCAACGCCCTTTC  |
| C0367 | anti-human CD2                         | TS1/8         | TACGATTTGTCAGGG  |
| C0368 | anti-human CD226 (DNAM-1)              | 11A8          | TCTCAGTGTGGTGG   |
| C0369 | anti-human CD29                        | TS2/16        | GTATCCCTCAGTCA   |
| C0370 | anti-human CD303 (BDCA-2)              | 201A          | GAGATGTCCGAATTT  |
| C0371 | anti-human CD49b                       | P1E6-C5       | GCTTTCTTCAGTATG  |
| C0373 | anti-human CD81 (TAPA-1)               | 5A6           | GTATCCTTCCTGGC   |
| C0384 | anti-human IgD                         | IA6-2         | CAGTCTCCGTAGAGT  |
| C0385 | anti-human CD18                        | TS1/18        | TATTGGGACACTTCT  |
| C0386 | anti-human CD28                        | CD28.2        | TGAGAACGACCCTAA  |
| C0389 | anti-human CD38                        | HIT2          | TGTACCCGCTTGTA   |
| C0390 | anti-human CD127 (IL-7Rα)              | A019D5        | GTGTGTTGTCCTATG  |
| C0391 | anti-human CD45                        | HI30          | TGCAATTACCCGGAT  |
| C0393 | anti-human CD22                        | S-HCL-1       | GGGTTGTTGTCTTTG  |
| C0394 | anti-human CD71                        | CY1G4         | CCGTGTTCCCTCATTA |
| C0396 | anti-human CD26                        | BA5b          | GGTGGCTAGATAATG  |
| C0407 | anti-human CD36                        | 5-271         | TTCTTTGCCTTGCCA  |
| C0420 | anti-human CD158 (KIR2DL1/S1/S3/S5)    | HP-MA4        | TATCAACCAACGCTT  |
| C0575 | anti-human CD49a                       | TS2/7         | ACTGATGGACTCAGA  |
| C0576 | anti-human CD49d                       | 9F10          | CCATTCAACTTCGGG  |
| C0577 | anti-human CD73 (Ecto-5'-nucleotidase) | AD2           | CAGTTCCTCAGTTCG  |
| C0581 | anti-human TCR Vα7.2                   | 3C10          | TACGAGCAGTATTCA  |
| C0582 | anti-human TCR Vδ2                     | B6            | TCAGTCAGATGGTAT  |
| C0591 | anti-human LOX-1                       | 15C4          | ACCCTTTACCGAATA  |
| C0592 | anti-human CD158b (KIR2DL2/L3, NKAT2)  | DX27          | GACCCGTAGTTTGAT  |
| C0599 | anti-human CD158e1 (KIR3DL1, NKB1)     | DX9           | GGACGCTTTCCTTGA  |
| C0830 | anti-human CD319 (CRACC)               | 162.1         | AGTATGCCATGTCTT  |
| C0845 | anti-human CD99                        | 3B2/TA8       | ACCCGTCCCTAAGAA  |
| C0853 | anti-human CLEC12A                     | 50C1          | CATTAGAGTCTGCCA  |
| C0864 | anti-human CD352 (NTB-A)               | NT-7          | AGTTTCCACTCAGGC  |
| C0867 | anti-human CD94                        | DX22          | CTTTCGGGTCCTACA  |
| C0894 | anti-human Ig light chain κ            | MHK-49        | AGCTCAGCCAGTATG  |
| C0896 | anti-human CD85j (ILT2)                | GHI/75        | CCTTGAGAGGCTATG  |
| C0897 | anti-human CD23                        | EBVCS-5       | TCTGTATAACCGTCT  |
| C0898 | anti-human Ig light chain λ            | MHL-38        | CAGCCAGTAAGTCAC  |
| C0902 | anti-human CD328 (Siglec-7)            | 6-434         | CTTAGCATTTCCTG   |
| C0912 | anti-human GPR56                       | CG4           | GCCTAGTTTCCGTTT  |
| C0918 | anti-human HLA-E                       | 3D12          | GAGTCGAGAAATCAT  |
| C0920 | anti-human CD82                        | ASL-24        | TCCCACTTCGGCTTT  |

|       |                         |      |                 |
|-------|-------------------------|------|-----------------|
| C0944 | anti-human CD101 (BB27) | BB27 | CTACTTCCCTGTCAA |
| C1046 | anti-human CD88 (C5aR)  | S5/1 | GCCGCATGAGAAACA |
| C1052 | anti-human CD224        | KF29 | CTGATGAGATGTCAG |

| <b><u>Marker</u></b> | <b><u>Fluorescent Channel</u></b> | <b><u>Dilution</u></b> | <b><u>Antibody clone</u></b> | <b><u>Vendor</u></b>  |
|----------------------|-----------------------------------|------------------------|------------------------------|-----------------------|
| Fixable Blue         | Ultraviolet                       | 1:400                  |                              | ThermoFisher L34962   |
| CD8                  | APC                               | 2:100                  | SK1                          | Biolegend 344721      |
| Dump CD14            | BV510 / AmCyan                    | 2:100                  | M5E2                         | Biolegend 301841      |
| Dump CD16            | BV510 / AmCyan                    | 2:100                  | 3G8                          | Biolegend 302047      |
| Dump CD20            | BV510 / AmCyan                    | 2:100                  | 2H7                          | Biolegend 302339      |
| CD2                  | FITC                              | 2:100                  | TS1/8                        | Biolegend 309205      |
| CD71                 | PE-Cy7                            | 3:100                  | CY1G4                        | Biolegend 334111      |
| CD38                 | BV421 / Pacific Blue              | 2:100                  | HIT2                         | Biolegend 303525      |
| CD4                  | PE                                | 2:100                  | RPA-T4                       | Biolegend 300507      |
| CD45RO               | BV605                             | 2:100                  | UCHL1                        | Biolegend 304237      |
| CD45RA               | PE-Dazzle 594                     | 2:100                  | HI100                        | Biolegend 304145      |
| HLA-DR               | BV785                             | 2:100                  | L243                         | Biolegend 307641      |
| ICOS                 | PerCP/Cyanine5.5                  | 2:100                  | C398.4A                      | Biolegend 313517      |
| KLRG1                | APC/Fire 750                      | 2:100                  | SA231A2                      | Biolegend 367717      |
| Ki-67                | BUV395                            | 3:100                  | B56                          | BD Biosciences 564071 |

### Supplementary table 3

#### **VI-GEM**

ACTG1  
PCLAF  
ACTB  
GAPDH  
CD38  
GZMH  
PFN1  
CORO1A  
PYCARD  
PSMB8  
TMSB10  
ARPC3  
CLIC1  
CD52  
TMSB4X  
APOBEC3H  
ADA  
SEM1  
MYL6  
GZMA  
DECR1  
ARPC2  
NOP10  
APOBEC3C  
LGALS1  
GZMB  
CFL1  
CLTA  
TWF2  
ISG15  
MXD4  
SUB1  
PSMA4  
HLA-DRA  
PPP1R18  
GSTO1  
APOBEC3G  
ARPC5  
UCP2  
PSMA5  
WDR1  
ARHGDIB

YWHAE  
CCL5  
SLC25A5  
PSMB4  
ITGB1  
DYNLL1  
ARPC4  
ATP5MC2  
FGFBP2  
GTF3C6  
RGS10  
ATP6V1D  
S1PR4  
EZH2  
ATP5F1A  
GMFG  
OSTF1  
PRF1  
ABRACL  
GLRX  
ACTR3  
SIT1  
TXNDC17  
H3F3A  
CCDC28B  
ATP5MG  
DNAJC15  
IDH2  
SEC11A  
FABP5  
CAPZB  
DBI  
IFI16  
DCTN2  
COTL1  
CNN2  
CHMP2A  
ATP5MC3  
ARPC1B  
NDUFS2  
MT1E  
MRPL28  
OAS2

SERPINB1  
CARHSP1  
TIMD4  
UBE2L6  
MYL6B  
DCTN3  
IRF4  
ANXA5  
ATP5F1B  
GIMAP4  
PSMB2  
NDUFB3  
NCOA4  
YARS  
CARD16  
COX5A  
FKBP1A  
TCEAL8  
CLDND1  
NDUFB5  
ATP5F1C  
MRPL42  
RPA3  
MT1F  
NUDT5  
POLR2G  
LDHB  
GBP1  
ATP5MF  
COX6B1  
COX6C  
SUCLG1  
TAP1  
CLIC3  
TPM4  
GBP2  
NDUFC2  
CHCHD1  
PPP1CA  
TKT  
SH3BGL3  
EIF4E2  
LAIR2



MRPL51  
TRAPPC1  
CSK  
BCL2L11  
LIMD2  
JPT1  
GTF2H5  
NDUFA12  
TROAP  
RTRAF  
ZYX  
RAC2  
CHCHD5  
MPG  
RPS6KA1  
SRSF9  
CEBPD  
GIMAP1  
COPZ1  
TALDO1  
CALM3  
EIF2S2  
HLA-DMA  
POMP  
PTRHD1  
COMMD4  
GGCT  
HAVCR2  
LAP3  
FERMT3  
COPS9  
QARS  
AP2S1  
ZNHIT1  
ICA1  
HADHB  
BLOC1S1  
RABL3  
IFI27L2  
RACK1  
CD27  
FKBP3  
MRPL10

TXNDC9  
FIBP  
PTTG1  
PSMD8  
CXCR3  
PSME1  
LCP1  
ACAA2  
CHI3L2  
NCKAP1L  
PPP4C  
IGBP1  
PSMB3  
LAMTOR2  
ARHGAP30  
TMEM256  
COPB2  
AC010618.1  
AP1S1  
PFDN4  
NT5C3A  
HMGA1  
MT-CO1  
PSMA2  
NSMCE1  
PARK7

## Supplementary table 4

| DE peaks       | Day2 VS Day0 | Day10 VS Day0 | Day28 VS Day0 |
|----------------|--------------|---------------|---------------|
| CD14 Mono      | 106          | 53            | 30            |
| CD16 Mono      | 3            | 9             | 2             |
| CD4 Naive      | 3            | 10            | 17            |
| B Naive        | 5            | 7             | 16            |
| CD4 TCM        | 5            | 10            | 20            |
| B Memory       | 2            | 2             | 7             |
| CD8 Naive      | 5            | 9             | 13            |
| Treg           | 5            | 2             | 1             |
| CD4 TEM        | 0            | 1             | 1             |
| CD8 TEM        | 8            | 11            | 13            |
| Plasmablast    | 6            | 2             | 3             |
| cDC2           | 0            | 4             | 2             |
| B Intermediate | 0            | 2             | 5             |
| NK             | 14           | 33            | 147           |
| gdT            | 2            | 6             | 1             |
| pDC            | 8            | 4             | 2             |
| HSPC           | 2            | 5             | 6             |
| MAIT           | 3            | 5             | 6             |
| dnT            | 6            | 8             | 7             |
| CD4 CTL        | 0            | 3             | 1             |
| group_A        | 3            | 3             | 2             |
| NK_CD56bright  | 1            | 1             | 1             |
| CD8 TCM        | 1            | 1             | 1             |
| ILC            | 1            | 0             | 2             |
| ASDC           | 0            | 0             | 1             |

## Supplementary table 5

chr

chr16-12535877-12536369  
chr9-114696813-114697631  
chr2-203992974-203993844  
chr12-68373863-68374762  
chr8-128240344-128240775  
chr3-98555731-98556776  
chr20-43751141-43751827  
chr6-14754522-14755395  
chr10-110774080-110774756  
chr6-215552-216076  
chr6-105646073-105646994  
chr7-141557586-141559197  
chr3-98563233-98565001  
chr16-12532825-12533524  
chr8-128313295-128314529  
chr4-6180756-6181471  
chr20-51480321-51482029  
chr5-54881393-54881834  
chr13-99289415-99290164  
chr7-105808894-105809727  
chr6-90472742-90474035  
chr7-25862146-25862939  
chr7-102713204-102714176  
chrX-119647790-119648748  
chr16-80569495-80570407  
chr1-228794148-228794958  
chr10-50508226-50508908  
chr15-78049717-78050830  
chr13-50236773-50237432  
chr4-6855736-6856274  
chr6-15023013-15023812  
chr3-112672375-112673288  
chr1-28199290-28200273  
chr7-105848903-105850036  
chr10-83680499-83680954  
chr10-114801347-114801887  
chr5-157540227-157542013  
chr18-13290874-13291504  
chr17-35889146-35891318  
chr4-36285871-36286777  
chr4-38128876-38129632  
chr1-53413083-53413952

chr1-174153226-174153960  
chr16-57609464-57610344  
chr10-33117519-33118430  
chr10-11863261-11864192  
chr13-42405754-42406775  
chr14-102819178-102820238  
chr5-88203915-88204906  
chr2-173354214-173355952  
chr6-150987362-150987976  
chr6-111837076-111838361  
chr22-37162313-37163194  
chr17-80891387-80892538  
chr4-77586728-77587485  
chr19-38559385-38560084  
chr2-241867958-241869125  
chr3-46280002-46280631  
chr6-89297665-89299339  
chr17-80720649-80721616  
chr20-51404522-51405254  
chr12-22409247-22410635  
chr12-68119366-68120395  
chr4-15771356-15771908  
chr11-115222256-115223506  
chr17-35879809-35880772  
chr1-235998819-235999954  
chr1-235873057-235873553  
chr15-60389189-60389862  
chr2-203994743-203995066  
chr8-29990261-29991348  
chr1-206769177-206769789  
chr10-117653202-117653457  
chr9-114690965-114691829  
chr20-47487129-47488096  
chr9-136538594-136540221  
chr11-48011545-48012508  
chr21-14533614-14535000  
chr20-43736680-43737282  
chr1-206784347-206784998  
chr18-74994541-74995453  
chr12-12384604-12385665  
chr1-116762992-116764942  
chr9-75152186-75152876  
chr6-142842495-142843686

chr5-55036947-55038114  
chr2-9702924-9704041  
chr3-177198518-177199544  
chr16-80580048-80580900  
chr14-50521302-50522369  
chr6-90402091-90402860  
chr7-105806469-105807005  
chr7-158656079-158656507  
chr12-12430971-12431338  
chr22-39910066-39911211  
chr2-241762612-241764237  
chr10-33133989-33134627  
chr10-50417571-50418785  
chr17-43251453-43252425  
chr7-69803886-69804352  
chr2-174752460-174753612  
chr2-203870982-203871910  
chr7-44623754-44624123  
chr11-121481443-121482985  
chr4-6198244-6199894  
chr11-61060933-61061969  
chr1-91548215-91549750  
chr14-80959445-80960042  
chr6-130222758-130224105  
chr11-128471219-128472561  
chr9-91071222-91071912  
chr2-239304087-239304652  
chr7-139043877-139044856  
chr1-160755722-160757125  
chr1-89607961-89609275  
chr6-399756-400322  
chr14-93962744-93963541  
chr16-89026034-89026577  
chr13-29935257-29936528  
chr14-65302879-65303336  
chr13-42392834-42393714  
chr6-391009-393578  
chr16-84593941-84594871  
chr2-86785428-86786719  
chr13-30739978-30740586  
chr22-39090265-39091449  
chr2-8050254-8050445  
chr15-98952249-98953660

chr9-131668413-131669374  
chr3-46285037-46285669  
chr1-25099293-25100697  
chr4-77595362-77595805  
chr2-203914649-203915266  
chr13-27130997-27131632  
chr6-16731171-16732149  
chr2-111633779-111634649  
chr13-33016394-33017916  
chr6-46011194-46012021  
chr6-225018-225931  
chr6-16420060-16421624  
chr1-8604046-8604798  
chr13-50366847-50367132  
chr3-46359784-46360433  
chr20-49805303-49805630  
chr12-24838415-24839762  
chr7-105298346-105298957  
chr14-61388107-61389462  
chr5-76732480-76733567  
chr6-17633078-17634064  
chr3-59235630-59235929  
chr11-123454159-123454697  
chr12-12474459-12475619  
chr16-79628532-79628904  
chr11-61083004-61084108  
chr16-89020234-89020732  
chr18-48833858-48835279  
chr20-5844306-5844654  
chr2-181106842-181107279  
chr2-105789763-105790968  
chr12-120012026-120012679  
chr1-200862002-200863430  
chr15-85318090-85318845  
chr16-70737057-70738492  
chr19-35710847-35711563  
chr20-51531153-51531707  
chr16-75620405-75620701  
chr7-150668151-150668988  
chr2-62306832-62307135  
chr6-389704-390062  
chr14-80930638-80931684  
chr8-125607721-125608579

chr17-27471758-27472215  
chr12-124774078-124775214  
chr20-49669484-49670325  
chr7-8125525-8126534  
chr15-78046922-78047365  
chr5-145946437-145946988  
chr5-55061772-55062830  
chr4-101020838-101021392  
chr1-91555596-91556756  
chr4-38306457-38306930  
chr1-117654186-117654915  
chr6-157143216-157143978  
chr17-57982428-57982810  
chr4-39353125-39354381  
chr4-1201032-1202569  
chr22-21766744-21767684  
chr1-76270317-76270894  
chr8-125125414-125126020  
chr15-60649521-60650521  
chr12-118053181-118053589  
chr6-27866128-27867669  
chr2-229822099-229822590  
chrX-135213449-135213839  
chr17-47829617-47830558  
chr2-168194846-168195544  
chr8-130244608-130245414  
chr3-66472214-66473398  
chr1-206737029-206737844  
chr14-99252920-99253893  
chr2-203948941-203949552  
chr13-18211717-18212548  
chr7-65798471-65798734  
chr1-236415918-236416841  
chr10-50527255-50527904  
chr12-50532476-50533306  
chr11-19240480-19241759  
chr20-49668407-49669257  
chr16-78742301-78743316  
chr22-38985033-38985520  
chr17-77783873-77784864  
chr2-111705743-111706315  
chr15-50260383-50260813  
chr6-16699130-16699786



chr7-55569433-55570663  
chr8-125514676-125515216  
chr1-159076530-159077709  
chr1-172674947-172675797  
chr2-231425698-231427372  
chr14-99243357-99243958  
chr1-195195341-195195951  
chr2-181163178-181163572  
chr17-27466299-27467042  
chr2-221517478-221518868  
chr14-91228231-91229217  
chr12-121671639-121673137  
chr9-131406643-131408195  
chr4-38132091-38132673  
chr2-62332860-62333452  
chr6-41531617-41532568  
chr17-49341895-49343592  
chr12-68159367-68160144  
chr1-203649518-203650808  
chr3-46947263-46948836  
chr2-84938242-84940261  
chr13-99367107-99368319  
chr6-446581-447349  
chr16-84548742-84549784  
chr17-35900348-35901224  
chr8-102106549-102107071  
chr17-80761295-80761768  
chr2-86825397-86826854  
chr6-209554-210289  
chr3-98546084-98546339  
chr11-128304778-128305877  
chr8-6417224-6418272  
chr3-71086983-71088163  
chr8-29408267-29408924  
chr6-135087283-135089514  
chr2-38665669-38667719  
chr20-48760183-48761833  
chr14-50000512-50002153  
chr2-230981512-230982197  
chr12-103505403-103505795  
chr1-234314932-234315821  
chr6-151373154-151374558  
chr10-119704032-119705723

chr22-30706117-30706478  
chr13-99380862-99381393  
chr14-92768203-92768874  
chr3-98557455-98557638  
chr11-35247295-35248318  
chr10-22681806-22684114  
chr10-50431860-50432122  
chr3-46284014-46284435  
chr1-26378135-26378926  
chr12-674073-675067  
chr14-91372703-91374193  
chr4-6898972-6900130  
chr1-91948139-91949368  
chr8-128273904-128274403  
chrX-39854769-39856096  
chr4-89283366-89284457  
chr8-47513508-47514258  
chr6-108865843-108866305  
chr14-102805403-102806146  
chr6-16761050-16763385  
chr12-666763-667938  
chr4-4268794-4270226  
chr5-55023922-55024365  
chr6-13375326-13375750  
chr10-8416063-8417103  
chr17-3796281-3797065  
chr10-3809551-3810687  
chr4-94214716-94215247  
chr8-29349697-29351592  
chr6-155223800-155224665  
chr10-8061187-8062197  
chr10-124688679-124689389  
chr3-187802851-187803302  
chr19-46954792-46956126  
chr11-67267333-67268690  
chrX-39860109-39860944  
chr6-90397855-90398644  
chr17-39769794-39770763  
chr1-40241324-40242363  
chr16-87979850-87980595  
chr7-8131792-8132669  
chrX-71622303-71623152  
chrX-9676985-9677882

chr5-59098968-59099948  
chr8-125930245-125931142  
chr8-115427530-115428107  
chr2-135954169-135954579  
chr16-57041182-57042656  
chr7-121530219-121531150  
chr2-12500992-12502168  
chr4-101019718-101020519  
chr20-51400234-51400902  
chr6-130259729-130261751  
chr3-59425851-59426332  
chr19-29623752-29624242  
chr10-14659304-14660255  
chr16-47544346-47544619  
chr1-203652822-203653573  
chr1-160437612-160438935  
chr5-66840498-66841261  
chr2-38696996-38698016  
chr22-39116969-39118349  
chr5-171957443-171958372  
chr5-157025080-157025856  
chr11-123358049-123358714  
chr2-230973973-230974845  
chr2-203859118-203859715  
chr2-213015586-213016452  
chr1-66247404-66248072  
chr15-70300130-70301059  
chr10-124611616-124613391  
chr10-6491944-6492576  
chr1-235876452-235876953  
chr18-657185-659070  
chr1-91876041-91876602  
chr6-142855910-142858437  
chr2-230659214-230660029  
chr14-106506733-106507705  
chr8-102528415-102529135  
chr3-46293195-46293723  
chr15-60540083-60540760  
chr6-152170458-152171715  
chr6-106163303-106164933  
chr5-39163976-39165255  
chr8-125151754-125151959  
chr17-59828974-59829895

chr3-32432474-32433588  
chr15-48645667-48645917  
chr2-38653478-38654777  
chr7-50350432-50351088  
chr2-9655487-9655899  
chr6-16657631-16658082  
chr6-27890464-27891090  
chr1-116799405-116800759  
chr6-11785993-11786489  
chr2-148813655-148814220  
chr17-35218333-35219133  
chr4-38131181-38131825  
chr6-108874441-108875458  
chr1-92537984-92539016  
chr6-2861098-2861947  
chr12-9364284-9365216  
chr16-89315693-89316678  
chr1-116808348-116809442  
chr6-26031755-26034157  
chr18-12839078-12840672  
chr2-111440374-111440880  
chr5-74578874-74579676  
chr4-3201850-3203145  
chr14-24673099-24674803  
chr22-36405098-36406355  
chr7-101126191-101127320  
chr1-67332807-67333673  
chr4-152485621-152486258  
chr3-196274381-196275269  
chr6-155171100-155171906  
chr22-37186029-37187010  
chr7-100545533-100546155  
chr10-3892380-3893209  
chr4-8409064-8410096  
chr4-142416603-142417419  
chr5-54610053-54611351  
chr2-204109824-204110728  
chr14-31127750-31128213  
chr9-4530336-4531129  
chr2-234488691-234489476  
chr2-234032226-234033217  
chr6-106141350-106142582  
chr10-26721425-26722062

chr7-8134139-8134656  
chr14-35416062-35417379  
chr6-45710336-45710898  
chr12-121033745-121034406  
chr6-45421611-45423795  
chr12-68163523-68163938  
chr6-143397092-143397946  
chr2-9656197-9657093  
chr9-121353341-121354332  
chr6-16669100-16669663  
chr12-130796849-130797669  
chr12-94941453-94942113  
chr4-1187076-1187516  
chr2-100060788-100061212  
chr1-32801172-32801666  
chr1-101178488-101179608  
chr6-130131744-130132832  
chr3-112676567-112677339  
chr2-161166541-161167334  
chr10-88825035-88825723  
chr2-181123607-181124766  
chr6-90284302-90286492  
chr16-68752622-68753010  
chr1-172894548-172895494  
chr6-157761205-157761679  
chr4-15755932-15756958  
chr11-63535028-63535465  
chr10-70610316-70611394  
chr1-111598436-111599038  
chr13-99351716-99352114  
chr6-16488028-16488519  
chr3-4821763-4822582  
chr7-24907414-24907913  
chr18-3060484-3062312  
chr8-22443487-22444377  
chr5-76738629-76739593  
chr1-243595927-243597047  
chr14-55102191-55103512  
chr3-122609921-122610421  
chr1-235887758-235888648  
chr14-68779766-68782473  
chr8-72000301-72001022  
chr10-33010101-33010571

chr16-4414158-4414896  
chr10-50636437-50637607  
chr7-100546464-100547172  
chr6-13747443-13747961  
chr22-37229318-37231107  
chr1-172658866-172659451  
chr22-39900428-39901698  
chr6-90411342-90411794  
chr22-39920223-39921515  
chr6-144353711-144354581  
chr10-14587645-14588844  
chr7-55308777-55310152  
chr17-50511168-50511393  
chr20-49484164-49484718  
chr2-96163572-96165139  
chr10-70578236-70578823  
chr14-106177156-106177716  
chr6-45586108-45587327  
chr15-60548112-60548588  
chr10-8402475-8403146  
chr6-39229089-39229916  
chr6-154246853-154247966  
chr6-16654635-16655213  
chr2-239321429-239322941  
chr2-110748181-110748922  
chr9-126982250-126982709  
chr11-64858628-64860102  
chr20-49595851-49596445  
chr17-80708513-80709349  
chr4-150828049-150828615  
chr5-110752082-110753243  
chr1-225460361-225461302  
chr1-24910842-24911869  
chr13-50365426-50366348  
chr3-30620050-30620861  
chr9-131731686-131731913  
chr6-34484923-34485181  
chr8-58991118-58992318  
chr3-39267498-39268493  
chr2-101272501-101273227  
chr11-86805829-86806577  
chr10-22646107-22647016  
chr1-158996233-158996743

chr5-54902721-54903263  
chr15-56537725-56538307  
chr20-51529875-51530231  
chr15-60551206-60552129  
chr2-241108668-241109430  
chr8-102097182-102098290  
chr11-59106461-59108353  
chr8-8227560-8229159  
chr2-233230830-233231433  
chr6-37502048-37503649  
chr1-160453438-160453775  
chr7-936488-936976  
chr17-21098961-21100060  
chr21-45227994-45228591  
chr8-128184654-128184856  
chr9-4653749-4654551  
chrX-124342433-124343521  
chr1-38029921-38030509  
chr4-38177011-38178112  
chr6-16700278-16701299  
chr3-183349353-183350857  
chr16-89097941-89098758  
chr3-47037719-47038568  
chr6-33426620-33427310  
chr6-107712748-107713478  
chr16-79278388-79279127  
chr22-36356868-36358152  
chr5-52743154-52744467  
chr8-100409709-100410886  
chr13-99307224-99308131  
chr19-246868-247480  
chr17-76997851-76998854  
chr16-68756345-68757153  
chr7-44638962-44639599  
chr14-65301961-65302590  
chr17-27473391-27474429  
chr17-65179116-65180403  
chr4-105306116-105306829  
chr7-21383140-21384303  
chr3-45976525-45977157  
chr9-137095630-137096476  
chr2-68766092-68768174  
chr18-48842315-48843203

chr16-29701648-29702842  
chr2-86807282-86809036  
chr8-28077746-28079223  
chr1-32798924-32799834  
chr8-125606270-125606568  
chr15-90407866-90408538  
chr6-144149994-144151883  
chr1-210373803-210374907  
chr18-69895341-69896872  
chr1-117664091-117664950  
chr10-3804002-3804872  
chr9-86106750-86107364  
chr20-32285256-32286357  
chr1-160744192-160744888  
chr10-22629923-22631122  
chr2-230793757-230794888  
chr1-12161509-12162362  
chr6-2857574-2858290  
chr8-115218547-115219355  
chr12-6443481-6443778  
chr17-15958715-15959689  
chr2-204015179-204015828  
chr8-73346311-73347038  
chr7-139035015-139036347  
chr7-131188383-131189261  
chr6-112027657-112028645  
chr10-6270214-6270788  
chr2-43426307-43427043  
chr2-43387141-43387733  
chr6-130575655-130576595  
chr3-66303406-66304027  
chr8-53657105-53658377  
chr3-28251840-28252810  
chr11-123430063-123431891  
chr1-172698996-172699755  
chr5-119328869-119329470  
chr6-498754-499958  
chr12-42299517-42300221  
chr20-3906869-3907865  
chr1-174204649-174205404  
chr11-121650526-121650808  
chr13-75489463-75490266  
chr1-235855802-235856392



chr3-4850267-4851481  
chr15-40743598-40744469  
chr2-10620554-10620937  
chr2-178193945-178194867  
chr12-46214787-46215566  
chr11-18246249-18247223  
chr1-24954934-24955612  
chr12-89468578-89469727  
chr6-105458544-105459681  
chr9-120891375-120893262  
chr6-158289869-158291139  
chr8-71843453-71844600  
chr11-47934507-47935082  
chr2-62208593-62209853  
chr2-108612137-108612970  
chr22-44709729-44711208  
chr5-163461416-163462108  
chr16-89360909-89361546  
chr4-152524241-152524886  
chr4-83235391-83236082  
chr14-22536844-22537617  
chr2-64325817-64326722  
chr11-48019324-48019527  
chr5-143008807-143009577  
chr8-133568596-133571290  
chr8-29229299-29229824  
chr10-70579727-70580048  
chr12-64668631-64670273  
chr1-115641636-115643141  
chr2-63977887-63978374  
chr2-15176941-15177613  
chr22-39076730-39077599  
chr5-74631293-74632425  
chr20-62922561-62922758  
chr17-2070263-2071009  
chr2-70068896-70069537  
chr16-78794609-78795274  
chr5-132019969-132020839  
chr9-131678496-131679051  
chr2-169362056-169365364  
chr1-89957050-89957622  
chr6-149147965-149148827  
chr13-42377513-42378321

chr19-11095028-11095455  
chr16-84514532-84515489  
chr17-50903899-50904753  
chr11-123068987-123070939  
chr10-8360290-8360995  
chr10-124718034-124718818  
chr1-232457532-232458007  
chr16-23482718-23483845  
chr1-91523391-91523919  
chr18-49168994-49169430  
chr1-223716317-223717062  
chr3-14142236-14143164  
chr3-59451037-59452111  
chr7-922597-923867  
chr5-113022359-113023329  
chr11-118001653-118003624  
chr11-48055294-48056426  
chr11-116953617-116954163  
chr4-89298848-89299657  
chr2-136362767-136363031  
chr7-7944366-7945293  
chr13-42396494-42396788  
chr22-21762958-21763765  
chr17-36463843-36464420  
chr7-30321610-30323336  
chr12-110577639-110578552  
chr2-111534903-111535246  
chr15-22264978-22265719  
chr14-100067942-100069253  
chr3-66302149-66303009  
chr8-100494259-100495680  
chr2-111632498-111633105  
chr22-37222414-37222991  
chr1-184890223-184891161  
chr10-33109544-33110653  
chr12-29148415-29150096  
chr10-6494781-6495554  
chr9-128033195-128033403  
chr3-15310688-15311008  
chr19-10797116-10798226  
chr5-160486296-160487066  
chr1-24966741-24966933  
chr13-25902992-25903249

chr21-28836474-28837129  
chr10-33114448-33114900  
chr7-44637855-44638767  
chr2-30336806-30337926  
chr4-40309168-40309926  
chr13-40518417-40518825  
chr13-114268333-114269437  
chr16-18767083-18767725  
chr2-232838346-232838951  
chr6-152184712-152185716  
chr17-1375602-1376297  
chr6-15305118-15306242  
chr1-19687779-19689025  
chr22-18091630-18092479  
chr2-203869342-203870184  
chr7-149600669-149601225  
chr2-144324555-144325728  
chr15-95839115-95840000  
chr1-198934861-198935829  
chr1-160519630-160520454  
chr11-48019992-48020701  
chr6-45709712-45710132  
chr2-230956817-230957724  
chr16-57014469-57015219  
chr6-90424973-90425865  
chr3-14598204-14598610  
chr2-9618344-9618931  
chr5-14593533-14593979  
chr16-81616125-81617151  
chr19-38556924-38557673  
chr12-6774704-6775145  
chr1-161409676-161410411  
chr14-24665415-24666156  
chr10-80487651-80488605  
chr8-23217954-23220048  
chr15-78061922-78062385  
chr6-111794693-111795422  
chr19-11096151-11096606  
chr1-40232479-40232906  
chr6-16436513-16437406  
chr1-206790530-206791041  
chr10-101858741-101859214  
chr1-192544956-192545411

chr10-26430578-26431191  
chr11-35330727-35331526  
chr5-14594706-14596133  
chr11-12174323-12175003  
chr12-54412913-54413907  
chr1-16727207-16727760  
chr3-5002384-5002964  
chr13-99273239-99273565  
chr15-64634064-64635129  
chr14-91350687-91351573  
chr6-16413046-16413875  
chr22-20327705-20328838  
chr8-144456337-144457312  
chr21-33947605-33949200  
chr5-157027756-157027998  
chr10-3811298-3811930  
chr17-48511024-48511660  
chrX-2696639-2697456  
chr12-104494210-104495189  
chr3-122074618-122075223  
chr2-176931798-176932623  
chr4-152458693-152459623  
chr11-48017236-48017751  
chr3-14988955-14989556  
chr14-106004974-106005745  
chr19-16338300-16339389  
chr10-70602388-70604420  
chr4-6200302-6201133  
chr17-78774573-78775527  
chr17-64081897-64082670  
chr16-82655255-82655938  
chr1-38027972-38028583  
chr1-221839593-221840309  
chr5-107476713-107477221  
chr3-56915963-56917072  
chr5-53041152-53041645  
chr20-53842233-53843136  
chr17-47220389-47221357  
chr13-50991605-50992811  
chr20-51402233-51402579  
chr14-91872097-91874064  
chr2-203886613-203887080  
chr15-69713975-69714692

chr11-128731081-128731352  
chr3-46370849-46371094  
chr6-16659338-16660340  
chr14-89616782-89618228  
chr10-119029058-119030963  
chr1-168408946-168409309  
chr15-65512829-65513351  
chr17-14205951-14206216  
chr2-224523276-224524851  
chr6-111750880-111751763  
chr7-150663921-150664160  
chr9-131627520-131628920  
chr17-62064069-62064355  
chr20-34620733-34621102  
chr1-35505876-35507473  
chr10-13340134-13340950  
chr6-15300535-15300969  
chr10-94544973-94546575  
chr15-64246783-64247050  
chr7-930034-930398  
chr20-38874873-38876031  
chr5-39209754-39210527  
chr5-157214811-157216105  
chr11-11620936-11622427  
chr3-122030371-122030998  
chr6-111823715-111825505  
chr14-91349304-91350046  
chr1-20185067-20186768  
chr3-144128179-144128727  
chr4-38160400-38161457  
chr8-25319391-25320045  
chr10-119120210-119120830  
chr20-48769115-48769922  
chr1-199941812-199942320  
chr11-122850031-122850589  
chr2-201123836-201124696  
chr9-134301647-134302154  
chr14-54435497-54435975  
chr22-30710116-30710431  
chr1-228765539-228766014  
chrX-71606656-71607413  
chr9-92963741-92965527  
chr6-13427519-13428777

chr16-79271897-79272755  
chr6-5302319-5303603  
chr6-142907065-142907977  
chr20-49534213-49535366  
chr6-139146453-139147027  
chr20-50338545-50339354  
chr15-94325036-94325563  
chr3-11306867-11307475  
chr1-172708307-172709023  
chr1-160640449-160640760  
chr15-69468190-69469224  
chr1-237411553-237412139  
chr16-57601775-57602574  
chr1-26799602-26800845  
chr5-157198359-157198958  
chr10-110085738-110087015  
chr2-37599489-37600410  
chr6-15326126-15326476  
chr17-74282594-74283424  
chr17-67434004-67436049  
chr6-144305807-144306492  
chr20-58982799-58983184  
chrX-124063794-124064630  
chr5-119353795-119354333  
chr15-62390011-62392151  
chr17-48505727-48506428  
chr16-48611675-48612276  
chr6-26232791-26235196  
chr22-26642790-26643839  
chr20-10568001-10568404  
chr12-130764086-130765505  
chr8-134324560-134325153  
chr6-45420674-45420885  
chr14-93103454-93104206  
chr6-188739-189358  
chr2-230660541-230662037  
chr7-25967998-25969008  
chr19-38864403-38865871  
chr16-88619630-88620748  
chr1-19476535-19478643  
chr1-150567255-150569354  
chr15-90096802-90098110  
chr1-23110540-23111276

chr2-179095922-179096760  
chr2-203950928-203951962  
chr6-11366536-11367804  
chr1-40185715-40186877  
chr1-32255407-32255946  
chr6-158567625-158568489  
chr2-239602167-239602845  
chr4-3192196-3193102  
chr2-234490105-234490897  
chr8-29680896-29681339  
chr7-139085134-139085888  
chr10-110356039-110357189  
chr11-62555363-62557101  
chr16-3577951-3579460  
chr7-43669130-43670028  
chr6-111767633-111768251  
chr15-55277081-55277575  
chr5-160467435-160468486  
chr12-122166523-122167327  
chr9-120905380-120906169  
chr17-59845769-59846662  
chr21-45224484-45225071  
chr6-142819400-142821112  
chr2-197293297-197294646  
chr9-79630794-79631331  
chr3-36912125-36913082  
chr15-91491236-91491736  
chr22-44652349-44653288  
chrX-71618295-71618790  
chr12-120013581-120014350  
chr16-11557043-11557729  
chr5-107474615-107475682  
chr3-106338313-106339264  
chr2-48362376-48362802  
chr2-98438625-98439258  
chr20-43840448-43840969  
chr17-40560195-40561297  
chr14-106184518-106185421  
chr3-123492077-123492537  
chr8-42177259-42178109  
chr3-59424436-59424959  
chr17-47703166-47703728  
chr8-29995091-29995463

chr4-6177680-6178180  
chr1-184745778-184746323  
chr9-134065818-134066326  
chrX-1534372-1537849  
chr11-122843184-122844130  
chr2-86860715-86862913  
chr17-40515319-40516169  
chr8-127977694-127978225  
chr8-128554849-128555809  
chr11-2387349-2388016  
chr3-132034564-132035396  
chr17-32523164-32523712  
chr22-22787821-22788718  
chr20-51541005-51543028  
chr4-121199713-121201215  
chr1-236394908-236396071  
chr1-9800153-9800684  
chr6-158717393-158718210  
chr5-157544519-157545106  
chr21-45226646-45227147  
chr2-144510386-144511022  
chr9-131709760-131710616  
chr13-24618093-24619141  
chr4-101039173-101039711  
chr2-68379220-68380001  
chr16-48608498-48608828  
chr3-66480657-66482109  
chr4-89294342-89295212  
chr8-664870-665238  
chr2-190695672-190696322  
chr22-39173881-39175045  
chr8-47602520-47602733  
chr8-133068220-133069047  
chr20-50110059-50110625  
chr1-198101660-198103103  
chr12-75943947-75945011  
chr1-67274655-67275091  
chr3-27900233-27900914  
chr5-159412088-159412919  
chr2-241863433-241863929  
chr3-106068537-106069249  
chr14-98173201-98174378  
chr19-4214532-4215116



chr11-48013030-48013939  
chr3-27905603-27906012  
chr15-90099118-90099370  
chr3-152323549-152324258  
chr1-24971185-24971969  
chr7-130960056-130961748  
chr14-91355073-91356745  
chr11-86047109-86048053  
chr5-157607616-157608183  
chr15-83446870-83447642  
chr18-58615186-58616238  
chr2-203867492-203868010  
chr13-99275049-99275335  
chr13-84136506-84137759  
chr16-87762144-87762566  
chr6-154229627-154230311  
chrX-41556951-41557297  
chr13-40653318-40654194  
chr3-112514555-112514903  
chr8-141244809-141245867  
chr17-77459030-77460455  
chr19-10566657-10567108  
chr1-172638710-172639793  
chr16-87764570-87766468  
chr11-128324229-128325308  
chr18-24000463-24001969  
chr8-100430559-100431412  
chr3-46348933-46350486  
chr1-53765771-53766091  
chr13-102798612-102800841  
chr15-52464367-52464825  
chr3-106184965-106185481  
chr10-102189062-102189884  
chr20-51666924-51667598  
chr20-51494211-51494891  
chr6-111764343-111765034  
chr14-105986475-105987217  
chr22-28810569-28812506  
chr7-142796506-142799412  
chr1-184866767-184867799  
chr10-3960709-3961715  
chr4-40305335-40305725  
chr3-187367795-187369364

chr3-111238913-111239376  
chr17-14201006-14202289  
chr3-106176493-106177350  
chr2-197062474-197063223  
chr22-31524147-31524566  
chr5-66828344-66829396  
chr1-203655741-203656168  
chr10-22649356-22649804  
chr3-42638155-42639553  
chr13-30147570-30149037  
chr8-47600564-47601338  
chr2-161952676-161953276  
chrX-1462649-1463475  
chr5-119287353-119288153  
chrX-10082730-10083611  
chr15-77013673-77014894  
chr17-67244761-67247464  
chr1-76294489-76295411  
chr16-87865979-87866443  
chr9-132451110-132451760  
chr10-69228775-69229846  
chr9-124868508-124870706  
chr17-2259460-2260483  
chr9-128026006-128027498  
chr5-55022329-55022825  
chr1-10510615-10511640  
chr22-37807506-37808310  
chr4-101327958-101328901  
chr6-105644147-105644533  
chr21-33949647-33950157  
chr7-8176006-8177464  
chr2-234290436-234291269  
chr21-38766844-38767765  
chr1-7930563-7931708  
chr2-135948473-135949067  
chr2-196291656-196292782  
chr10-70162314-70163285  
chr6-110944517-110945189  
chr7-150665907-150666311  
chr1-84971999-84972829  
chr22-39097162-39097450  
chr14-91397220-91398079  
chr4-89298154-89298561

chr10-71726130-71726503  
chr6-45663488-45664158  
chr19-15467044-15467348  
chr2-230877450-230878427  
chr1-230208578-230209343  
chr17-80876616-80877704  
chr19-49567785-49569408  
chr3-122091480-122092927  
chr17-1823283-1824103  
chr20-62739599-62741053  
chr3-11624131-11625201  
chr10-113960562-113962090  
chr2-136382006-136382807  
chr6-501875-502506  
chr16-27449580-27450430  
chr15-60582425-60582723  
chr5-112923189-112924165  
chr2-173149625-173150284  
chr14-65637719-65638269  
chr10-14584712-14585006  
chr5-156920359-156920960  
chr14-24692833-24693595  
chr22-25067784-25069024  
chr2-233233773-233234635  
chr1-117655959-117656786  
chr6-16651631-16652390  
chr6-90080629-90081582  
chr19-8575478-8576123  
chr6-13355301-13356601  
chr15-69755515-69755996  
chr5-14809473-14810372  
chrX-124346093-124347550  
chr2-96156283-96156803  
chr6-142845024-142846193  
chr16-79283602-79284019  
chr8-93904100-93904673  
chr8-142844668-142845236  
chr7-35652085-35652491  
chr1-184840399-184841091  
chr17-3710723-3711537  
chr2-230781328-230782084  
chr19-6592538-6592963  
chr3-37430757-37431492

chr16-29600099-29601087  
chr2-239548597-239548854  
chr14-94056552-94057310  
chr19-47541529-47542239  
chr7-38232339-38233519  
chr4-101418033-101418849  
chr2-234291778-234293035  
chr10-5975854-5978268  
chr5-126449626-126451172  
chr15-39623350-39624157  
chr12-6532346-6533007  
chr20-44646130-44647122  
chr7-44635380-44635600  
chr10-73758916-73760029  
chr10-6927427-6928971  
chr5-134111857-134112103  
chr2-98835712-98836646  
chr1-198519591-198521111  
chr19-13838926-13840720  
chr16-50267439-50267943  
chr10-333377-334286  
chr3-59515041-59515484  
chr13-20419562-20420106  
chr3-59443733-59444915  
chr1-68496113-68497603  
chr14-21263798-21264576  
chr5-68711239-68712155  
chr7-36787868-36788524  
chr17-35341334-35342055  
chr17-40607631-40608669  
chr2-204026937-204027584  
chr19-45016176-45017335  
chr5-179836443-179837347  
chr16-31421659-31422108  
chr7-70679445-70680142  
chr21-28837495-28837909  
chr15-50181989-50183072  
chr14-72476578-72477321  
chr12-10394558-10396015  
chr14-99286761-99287878  
chr6-155050354-155050725  
chr14-24694763-24695753  
chr12-47215401-47217057

chr17-45312088-45312380  
chr15-99104784-99105990  
chr10-62047906-62048386  
chr1-8829321-8830025  
chr6-106125848-106126693  
chr11-48001271-48002235  
chr5-119340384-119342413  
chr13-114339786-114340630  
chr2-36240205-36241261  
chrX-3707745-3708299  
chr22-39094756-39095007  
chr15-67102048-67102703  
chr5-157252674-157253813  
chr21-46559102-46560137  
chr16-82653651-82654406  
chr6-128258996-128260553  
chr2-10493363-10494128  
chr1-203764568-203765891  
chr17-32519199-32520627  
chr11-12195793-12196654  
chr6-16956350-16956922  
chr22-39080362-39080803  
chr9-130038020-130038628  
chrX-1657413-1657939  
chr6-127934137-127935019  
chr4-2511041-2512280  
chr16-31364910-31365591  
chrX-65723611-65724227  
chr22-24409817-24410667  
chr4-39031834-39032989  
chr2-86790795-86791803  
chr6-16729317-16729694  
chr15-78047778-78048161  
chr2-239150367-239151205  
chr5-156922149-156922779  
chr2-203718098-203718530  
chr3-42555806-42556839  
chr16-89925830-89926750  
chr1-89285625-89287538  
chr14-91229535-91230503  
chr19-29622071-29622806  
chr2-179031627-179032701  
chr1-91731348-91732875

chr9-89426344-89427018  
chr1-111219748-111220076  
chr4-121696107-121697937  
chr12-22334522-22336046  
chr1-205479968-205482071  
chr1-160682949-160683815  
chr1-12201437-12202121  
chr7-140223688-140224283  
chr7-131231205-131231915  
chr8-93700001-93701181  
chr17-40540357-40541999  
chr16-28140830-28142538  
chr10-61961325-61962365  
chr19-6590310-6591329  
chr4-153521354-153523014  
chr2-111483050-111483602  
chr18-61948889-61949549  
chr19-19451366-19452650  
chrX-30712954-30713567  
chr22-42316929-42317557  
chr17-59837177-59838132  
chr13-99355903-99357528  
chr15-48962929-48964481  
chr9-132908478-132909111  
chr20-1664786-1665637  
chr10-3067104-3069214  
chr16-70520816-70521004  
chr16-57592466-57593303  
chr12-669049-669425  
chr5-88251047-88251457  
chr2-239288888-239289897  
chr1-235104057-235105570  
chr20-37043222-37044547  
chr19-10104645-10105292  
chr15-67240206-67241649  
chr15-52220866-52222344  
chr14-63477967-63478870  
chr2-136057006-136057660  
chr16-8958374-8958685  
chr7-106346450-106347331  
chr22-37163891-37164601  
chr12-107368632-107369274  
chr10-6542961-6544020

chr2-135819811-135820644  
chr15-31434600-31436377  
chr17-66548065-66548701  
chr14-91260958-91261669  
chr4-153487546-153489371  
chr5-131336710-131337965  
chrX-134718596-134719224  
chr4-38310381-38311063  
chr10-124722993-124723721  
chr2-8346011-8347061  
chr1-30743485-30744606  
chr7-43650658-43651565  
chr11-60915258-60915933  
chr20-63728421-63728810  
chr19-39351316-39351987  
chr21-42238469-42238880  
chr6-111758899-111760536  
chr1-15963913-15964287  
chr6-105648231-105648540  
chr3-96813063-96814046  
chr5-126758230-126759090  
chr5-139458624-139459396  
chr5-172178788-172179936  
chr1-192571811-192572159  
chr17-40480137-40481180  
chr11-6319493-6321149  
chr14-90060240-90061216  
chr20-20603088-20603956  
chr10-8365985-8366508  
chr2-70108546-70109662  
chr10-17026779-17027305  
chr13-45398905-45399364  
chr17-80780198-80781532  
chr1-51520682-51521145  
chr10-49762149-49762520  
chr11-35257098-35257797  
chr12-22396124-22397195  
chr2-223760713-223762051  
chr2-202266659-202267114  
chr5-157575080-157576267  
chr3-28326243-28326948  
chr13-26557254-26557918  
chr9-97038809-97039624

chr8-134278126-134278726  
chr12-105330044-105332116  
chr12-4142736-4143503  
chr15-64911316-64912111  
chr6-34656101-34658166  
chr3-46097784-46098915  
chr19-51395289-51395742  
chr1-168520117-168521106  
chr15-50262161-50263106  
chr6-150865373-150866889  
chr22-41939947-41941607  
chr11-128290001-128291107  
chr22-37306802-37308206  
chr14-97702925-97703531  
chr20-51525174-51526245  
chr2-223941617-223942167  
chr1-226723782-226724712  
chr17-36082120-36083195  
chr6-24974078-24975084  
chr12-110727794-110728391  
chr9-73153902-73155332  
chr9-133133451-133134588  
chr3-52892833-52893216  
chr3-156483458-156484907  
chr8-38359291-38360139  
chr5-50593571-50594324  
chr15-90142628-90143611  
chr1-202162091-202162437  
chr8-38465416-38467182  
chr2-12412849-12413306  
chr14-105858874-105860292  
chr19-46786102-46786960  
chr11-85827602-85828148  
chr16-53534901-53535289  
chr18-77101269-77102875  
chr17-47217211-47217615  
chr7-92809476-92810482  
chr3-196179406-196180354  
chr6-45619986-45620510  
chr21-25572891-25574199  
chr10-79285416-79285623  
chr4-26075585-26076626  
chr3-36876123-36877128



chr12-21456226-21456984  
chr18-79245528-79246829  
chr16-81841650-81844097  
chr1-161541946-161542383  
chr3-194326870-194328486  
chr18-13266117-13267493  
chr10-17443892-17444687  
chr20-24948731-24949998  
chr15-63497101-63498490  
chrX-1468269-1468803  
chr8-143549347-143549709  
chrX-124212636-124213008  
chr2-62304536-62305376  
chr9-91796655-91799044  
chr5-145941162-145941969  
chr2-110858216-110859348  
chr2-230411215-230412625  
chr6-152636056-152637172  
chr9-121071649-121072436  
chr11-128551588-128552344  
chr15-44545814-44546696  
chr3-171248325-171249278  
chr10-124696491-124697224  
chr20-10350690-10351925  
chr8-129971493-129972464  
chr8-134332743-134333603  
chr5-139389694-139390340  
chr13-112768869-112769304  
chr2-102366759-102368135  
chr5-72194739-72195242  
chr20-10446902-10447358  
chr11-118007149-118008688  
chr7-8198078-8198787  
chr11-3946799-3947729  
chr22-37896155-37896838  
chr19-18088548-18089567  
chr12-66303548-66303912  
chr16-89409074-89409727  
chr11-88353871-88354474  
chr22-44455146-44456116  
chr5-142783324-142784652  
chr7-139100309-139101275  
chr1-101081092-101082029

chr14-106013761-106014271  
chr3-27880948-27882110  
chr10-23362940-23364087  
chr2-168211004-168212499  
chr6-53312335-53312896  
chr9-91950022-91950662  
chr19-54210694-54211387  
chr13-46679322-46680304  
chr12-104462845-104463873  
chr2-86079835-86081071  
chr6-20365413-20367377  
chr15-85691492-85692042  
chr15-60397109-60399295  
chr1-6600977-6601603  
chr3-12003784-12004584  
chr4-101334818-101335493  
chr7-603643-604987  
chr22-35648047-35649424  
chr14-91249910-91250493  
chr10-17511182-17511876  
chr9-89437075-89437954  
chr1-198918983-198920463  
chr16-80590964-80591818  
chr8-67505912-67506518  
chr2-102368502-102368943  
chr6-15296721-15296997  
chr9-131662054-131662438  
chr11-12087210-12088420  
chrX-124239382-124240441  
chr1-116769129-116770976  
chr1-46549501-46550266  
chr21-25563378-25563933  
chr2-234026660-234027153  
chr10-133388775-133390371  
chr8-206536-207266  
chr1-25642181-25643128  
chr15-77012787-77013374  
chr10-50512911-50513466  
chr6-16503880-16504890  
chr2-24919135-24921108  
chr12-9670847-9671728  
chr1-248924635-248925512  
chr1-206470176-206471557

chr4-145125921-145126658  
chr5-73693534-73694850  
chr6-90103277-90103814  
chr22-26592409-26592839  
chr5-126747865-126748454  
chr2-136327108-136327927  
chr15-85625490-85626352  
chr15-60840619-60841511  
chr2-203763436-203764348  
chr5-55072557-55073431  
chr11-117969466-117969881  
chr1-224497703-224498833  
chr4-40672552-40673579  
chr3-71421646-71422861  
chr6-135624149-135625174  
chr7-111012808-111013730  
chr19-51372623-51373397  
chr9-36470694-36471368  
chr6-26054738-26056945  
chr2-239274697-239275695  
chr6-111803439-111805309  
chr6-16704380-16704964  
chr22-40240770-40241777  
chr8-20251515-20252408  
chr4-121706406-121707317  
chr8-115429187-115429596  
chr5-76714682-76716913  
chr15-60541861-60542509  
chr5-60843946-60844513  
chr7-44631064-44631762  
chr14-93959298-93960068  
chr10-69045308-69046132  
chr4-2936138-2936324  
chr13-24625442-24626925  
chr17-35895878-35896672  
chr17-78816953-78817716  
chr3-46959009-46959770  
chr1-200129199-200130087  
chr6-235862-236524  
chr14-71555177-71556438  
chr4-37890475-37892077  
chr1-24964682-24965662  
chrX-19747420-19748426

chr20-49700664-49701694  
chr8-95099876-95101115  
chr2-156480118-156480894  
chr12-12736645-12737567  
chr11-66327851-66328891  
chr1-221829263-221830152  
chr6-111793567-111794369  
chr7-70647789-70648829  
chr22-39040329-39041216  
chr9-114681470-114682350  
chr3-10551901-10552845  
chr17-82882555-82883255  
chr2-230441294-230442108  
chr9-76577404-76578138  
chr1-161626522-161627082  
chr1-31932609-31932842  
chr16-87963248-87963878  
chr10-8056977-8057315  
chr5-119308434-119309767  
chr8-127976575-127976953  
chr16-56999231-57000903  
chr2-61670456-61671496  
chr10-80472116-80472581  
chr1-156920292-156920844  
chr12-68080553-68080933  
chr11-78464222-78465918  
chr2-9641656-9642177  
chr3-157066935-157067756  
chr12-56683671-56684430  
chr1-169692454-169693537  
chr13-114142350-114144001  
chr11-85750714-85751025  
chr5-102754323-102756423  
chr5-40437455-40438099  
chr1-32627426-32628237  
chr10-102241427-102241937  
chr2-105797115-105797813  
chr5-132456270-132457977  
chr10-43228663-43229921  
chr6-16319707-16320534  
chr9-21919453-21920344  
chr19-10963436-10963833  
chr20-58408040-58409163

chr3-187798275-187799467  
chr11-14414691-14415663  
chr9-87276224-87277297  
chr19-10112013-10113458  
chr2-48343723-48344667  
chr16-88456115-88456455  
chr10-124650318-124651399  
chr2-8425099-8426124  
chr14-65927678-65928525  
chr14-74617915-74618938  
chr20-43914401-43916290  
chr1-24915480-24916034  
chr12-68673672-68674162  
chr3-134794829-134795747  
chr5-55096056-55097402  
chr20-433300-433978  
chr13-40388557-40389736  
chr7-5143024-5143500  
chr16-56938367-56940186  
chr7-25856627-25857473  
chr6-111487791-111488001  
chr10-3874733-3876218  
chr2-108609027-108609465  
chr14-71142353-71143780  
chrX-104110436-104111223  
chr15-49235459-49236059  
chr3-71050359-71051159  
chr8-25322595-25323291  
chr4-2570579-2571374  
chr1-6358705-6360191  
chr1-204452850-204453624  
chr2-85704804-85705392  
chr8-58360958-58361486  
chr2-161384792-161385297  
chr7-140358444-140359694  
chr2-105855785-105857665  
chr17-27569185-27569806  
chr5-55101515-55102915  
chr9-92440533-92441063  
chr3-30655018-30655916  
chr6-152634708-152635311  
chr14-98198151-98198798  
chr9-89422219-89422465

chr10-79347005-79348492  
chr1-117661023-117661455  
chr4-39812345-39815058  
chr14-81485264-81485717  
chr8-140590904-140591891  
chr6-27814251-27815488  
chr12-124992869-124994958  
chr18-13279116-13279879  
chr3-11784462-11785469  
chr12-117968811-117969496  
chr12-64679537-64680177  
chr2-174750817-174751435  
chr3-32428172-32428969  
chr1-15949347-15950197  
chr6-37507995-37508601  
chr9-120925923-120926867  
chr20-36644201-36644990  
chr12-50221365-50222975  
chr8-133066763-133067353  
chr1-24997355-24998065  
chr11-133082780-133083380  
chr20-49676504-49677468  
chr1-160428759-160430243  
chr19-38683536-38684718  
chr11-72519365-72520519  
chr10-124734237-124735167  
chr8-122909934-122911447  
chr8-133054813-133055086  
chr8-127992706-127993771  
chr17-74279997-74280579  
chr11-12673802-12674830  
chr5-111229952-111230754  
chr16-89357419-89358919  
chr17-40516539-40517349  
chr11-32829264-32830618  
chr1-24922337-24922589  
chr19-2081821-2082528  
chr9-14322158-14323114  
chr12-12467294-12468172  
chr3-46955794-46956298  
chr5-40441634-40442634  
chr1-224623471-224624524  
chr20-63902721-63903303

chr12-77065053-77066185  
chr3-69012855-69014202  
chrX-124395180-124396080  
chr16-4142242-4142783  
chr3-183555302-183556201  
chr10-124719028-124719743  
chr15-31346408-31346852  
chr2-70132346-70133152  
chr10-69089777-69090592  
chr5-132426417-132428179  
chr4-40200028-40201255  
chr1-12047106-12047983  
chr12-39331610-39332319  
chr2-127829617-127830395  
chr8-96282796-96284130  
chr15-31387199-31388078  
chr15-63939574-63940106  
chr9-133141874-133142584  
chr3-69197865-69198660  
chr3-4834338-4834828  
chr8-81280065-81281678  
chr12-96500863-96502065  
chr19-8568880-8569770  
chr4-15962892-15963915  
chr4-109690498-109691770  
chr10-124732796-124733479  
chr20-38872956-38873781  
chr3-45950445-45951534  
chr17-40531233-40531957  
chr4-38523661-38524463  
chr3-128112411-128113255  
chrX-1471768-1472379  
chr20-57618905-57621225  
chr1-64922365-64923779  
chr16-89723565-89724161  
chr2-201130590-201131303  
chr3-27840746-27841214  
chr22-26657102-26657908  
chr7-50331702-50332236  
chr4-154743442-154744406  
chr16-28309762-28310543  
chr11-118240672-118241984  
chr5-156913443-156914636

chr19-7186147-7186685  
chr1-25064582-25066587  
chr16-80803775-80804927  
chr5-157195989-157196349  
chr10-62853031-62854220  
chr13-99322099-99323298  
chr11-67408570-67409879  
chr20-5911149-5912018  
chr15-64009696-64010207  
chr17-3794997-3795763  
chr19-39297911-39298643  
chr7-925696-925950  
chr10-119090402-119091571  
chr17-63598267-63598624  
chr15-64247998-64248462  
chr1-24923608-24923854  
chr22-37149640-37150513  
chr21-35045171-35046280  
chr16-57128671-57129444  
chr14-72594202-72594954  
chr19-41871529-41872125  
chr19-38636737-38637457  
chr8-27837257-27838316  
chr1-229253164-229253907  
chr4-26197228-26197933  
chr5-80755577-80756439  
chr6-148355-148969  
chr8-128076759-128077283  
chr3-101518198-101518936  
chr15-60549723-60550173  
chr21-42959009-42959377  
chr12-3728020-3729190  
chr3-30643899-30645092  
chr8-74350107-74350991  
chr1-24985011-24985554  
chr2-121699203-121700156  
chrX-39869922-39870856  
chr22-49825880-49828155  
chr7-30347672-30348713  
chr1-8473387-8473909  
chr11-36375974-36378415  
chr14-75514217-75515998  
chr12-132818399-132818947



chr3-157128247-157130836  
chr5-169650973-169651429  
chr7-924772-924943  
chr17-47204075-47206041  
chr14-22549835-22550631  
chr10-71742139-71743209  
chr8-70141201-70142636  
chr2-32946200-32947110  
chr8-142841695-142842358  
chr9-127970101-127971773  
chr16-2968771-2970397  
chr10-62383575-62385002  
chr11-60978610-60979499  
chr3-152100512-152100978  
chr16-26597974-26598630  
chr21-33975394-33976990  
chr6-45677405-45678075  
chr4-40238047-40239402  
chr4-1176830-1177900  
chr12-47229394-47230119  
chr15-67085302-67086330  
chr4-82798225-82799776  
chr2-167292439-167293722  
chr2-7725179-7726125  
chr2-234025234-234026322  
chr1-42931089-42932662  
chr3-160801408-160802335  
chrX-72094771-72095462  
chr19-1883952-1884668  
chr17-30363512-30364304  
chr12-96445500-96446574  
chr19-1062827-1063412  
chr9-132486840-132488065  
chr6-75496189-75496772  
chr2-86793702-86794161  
chr12-6533575-6535652  
chr15-77021663-77022513  
chr11-65421219-65421687  
chr7-29255939-29256352  
chr6-127950600-127951958  
chr12-122898404-122899054  
chr16-30472197-30472973  
chr4-1330019-1331287

chr11-118230046-118230370  
chr2-180590972-180591614  
chr2-134288701-134289685  
chr10-84356879-84357277  
chr3-189049473-189050200  
chr7-7815920-7816695  
chr10-3757505-3758585  
chr8-115222647-115223344  
chr20-48818373-48819070  
chr14-95523188-95524431  
chr8-100386053-100386788  
chr10-8053298-8055189  
chr22-39908771-39909033  
chrX-45758325-45759527  
chr17-47735562-47735898  
chr14-22531183-22532107  
chr1-233294970-233295914  
chrX-134549185-134551264  
chr6-13383290-13384136  
chr20-63134519-63135658  
chr1-235641943-235643026  
chr2-7437238-7438492  
chr1-91753280-91754737  
chr16-15389757-15390349  
chr6-27823748-27825144  
chr8-101902425-101903318  
chr5-157186587-157187678  
chr1-159008677-159010523  
chr10-100370576-100371598  
chr12-673014-673575  
chr6-45155947-45156467  
chr4-26873064-26874044  
chr16-67967274-67969508  
chr14-39229019-39229815  
chr5-132102187-132102686  
chr3-189132126-189133039  
chr6-2869044-2869897  
chr2-8515054-8516267  
chr20-51528635-51528982  
chr1-121365295-121366251  
chr10-131904572-131905022  
chr16-69443761-69445244  
chr7-21355231-21355995

chr16-88637095-88637685  
chr11-796015-796738  
chr6-46174767-46175161  
chr12-44847595-44848940  
chr1-172662524-172663313  
chr6-16712346-16713706  
chr2-144454631-144455126  
chr17-47740766-47742109  
chr2-171319031-171319698  
chr6-31203357-31204515  
chr2-62313697-62314520  
chr19-38681030-38681649  
chr12-104682578-104683350  
chr12-68364834-68365738  
chr6-33620217-33622011  
chr3-18740434-18741755  
chr1-89125744-89126414  
chr18-107878-110780  
chr1-111592542-111593477  
chr19-46936450-46937122  
chr12-79927790-79928670  
chr15-31347167-31347940  
chr1-184386490-184388686  
chr1-156813772-156814430  
chr12-9669552-9669883  
chr11-86182929-86183968  
chr2-96131419-96131924  
chr1-116738562-116739377  
chr1-24924952-24925648  
chr10-11178340-11179277  
chr7-139091209-139091441  
chr22-36331238-36333308  
chr6-14452521-14453538  
chr8-133693968-133694732  
chr19-4914870-4915459  
chr14-61385102-61385824  
chr16-56657196-56658393  
chr8-97980040-97980523  
chr7-130941430-130941729  
chr6-137707616-137708883  
chr15-39624638-39625361  
chr12-14396108-14396402  
chr17-4374967-4375861

chr3-30630800-30632021  
chr20-44019424-44020334  
chr12-107178644-107179376  
chr17-68184677-68185299  
chr20-33369274-33369915  
chr1-24992335-24993195  
chr10-13116073-13116947  
chr14-61335855-61336290  
chr2-197240148-197241092  
chr17-82863766-82864730  
chr22-37638472-37640051  
chr4-56048525-56050002  
chr3-123884081-123884788  
chr22-38981908-38982616  
chr12-6337138-6337681  
chr8-133046357-133046882  
chr1-10498246-10498528  
chr2-241870983-241871739  
chr6-140809489-140810153  
chr1-174964270-174965856  
chr20-51424281-51425077  
chr10-28668580-28669200  
chr22-49867680-49868392  
chr15-60004958-60006825  
chr5-170278524-170279578  
chr11-122743660-122744532  
chr2-237694467-237695596  
chr14-73711991-73713056  
chr1-198668906-198669419  
chr5-35810437-35811849  
chr22-36383258-36383494  
chr9-114718704-114719301  
chr21-33936492-33938332  
chr2-15316296-15317013  
chr14-91113635-91115653  
chr11-67271356-67272100  
chr16-56625079-56626211  
chr12-76020149-76021472  
chr1-23118835-23119662  
chr18-59899378-59901148  
chr1-67307139-67308069  
chr14-24605513-24605859  
chr1-210332261-210333236

chr14-100066020-100066529  
chr12-93436142-93436746  
chr2-105744392-105746937  
chr3-106205864-106207067  
chr17-49715113-49716383  
chr1-54800818-54801865  
chr6-111843587-111844141  
chr1-89610297-89611100  
chr6-149031865-149032867  
chr14-73741456-73742623  
chr9-120897077-120897519  
chr4-40205185-40205940  
chr22-36329137-36329609  
chr2-157439492-157440096  
chr15-22796624-22797355  
chr16-48612725-48613644  
chr5-129903964-129904974  
chr2-196200389-196201458  
chr3-186930111-186932275  
chr13-32530710-32531982  
chr21-14522943-14523781  
chr17-32523978-32524535  
chr9-127423804-127424996  
chr19-10101991-10102547  
chr12-8644197-8645382  
chr20-44643569-44643988  
chr14-100078591-100079543  
chr6-106194941-106196118  
chr9-109320830-109321447  
chr6-36120281-36121599  
chr6-13453847-13455308  
chr6-24935430-24937144  
chr3-46372449-46372740  
chr6-26249595-26250959  
chr15-55281970-55282866  
chr8-47597952-47598490  
chr1-159012548-159012954  
chr16-29094324-29095566  
chr15-78033975-78035716  
chr14-99240716-99241942  
chr15-55279666-55280326  
chr17-77843360-77844293  
chr17-44655910-44656655

chr7-50266014-50267708  
chr6-135094174-135095102  
chr1-29230543-29231373  
chr17-43211403-43213008  
chr12-24902272-24904171  
chr17-80265515-80265893  
chr9-33130455-33131143  
chr15-89243442-89244638  
chr18-69885613-69886595  
chr20-59159246-59160049  
chr12-11650859-11651358  
chr11-118342462-118342995  
chr16-88780935-88782174  
chr1-243421329-243422302  
chr20-59177545-59178382  
chr6-36912035-36913212  
chr3-30640036-30640295  
chr6-111805533-111806106  
chr2-8310581-8311278  
chr19-19661905-19662174  
chr7-50329704-50330960  
chr5-60699489-60700667  
chr14-91315716-91316456  
chr12-10285881-10286690  
chr9-110047792-110049911  
chr3-46108980-46109769  
chr17-35244282-35244857  
chr1-230426171-230426949  
chr11-123087575-123088173  
chr20-51532993-51533266  
chr9-133130822-133131316  
chr14-101823173-101824058  
chr13-50255691-50256946  
chr1-67336704-67337186  
chr8-38184517-38184986  
chr2-12708827-12709753  
chr1-31943770-31945027  
chr2-241858706-241859274  
chr3-39234508-39235225  
chr10-12365831-12366616  
chr15-40765089-40765836  
chr7-26166645-26167769  
chr22-43086158-43086413

chr9-76655043-76655588  
chr16-81715172-81716138  
chr12-51970955-51971466  
chr15-85692615-85693497  
chr1-160558747-160560759  
chr7-128320176-128321333  
chr2-69648180-69648789  
chr17-68180382-68181723  
chr16-47142979-47144577  
chr16-16025154-16026171  
chr19-290081-290653  
chr11-61023568-61023987  
chr1-10494609-10495696  
chr6-106525121-106525522  
chr5-146765209-146765840  
chr4-39932796-39933433  
chr3-138780812-138781622  
chr15-94305025-94305499  
chr6-127971626-127972662  
chr20-43959091-43959898  
chr2-144505422-144505902  
chr1-206828982-206830258  
chr7-43625230-43626403  
chr14-50362607-50364276  
chr12-110688779-110690130  
chr15-99014712-99015694  
chr1-3889976-3891345  
chr6-5173880-5175195  
chr7-157302114-157302921  
chr1-160742492-160742802  
chr6-15299216-15300030  
chr2-171521998-171524184  
chr6-21438265-21439322  
chr6-193809-194342  
chr13-23979494-23980645  
chr1-2554990-2557123  
chr2-222423640-222425584  
chr17-63522818-63523577  
chr16-29626678-29628146  
chr5-170266802-170268198  
chr7-37342420-37343536  
chr3-27721033-27722642  
chr1-147084170-147085383

chr5-94793123-94794146  
chr22-45129716-45130272  
chr1-20932058-20933064  
chr18-3511720-3512543  
chr18-48868347-48869506  
chr21-46424001-46426001  
chrX-136935421-136936093  
chr4-83217435-83218405  
chr8-102585109-102586309  
chrX-12984625-12985620  
chr11-116853365-116854245  
chr22-48097848-48099105  
chr2-8543294-8544272  
chr6-45830457-45831730  
chr1-234601424-234601910  
chr16-84738154-84738931  
chr2-53786212-53787831  
chr2-98460766-98461428  
chr9-131667654-131668005  
chr22-36334199-36335229  
chr17-8161990-8162440  
chr1-230126966-230127328  
chr7-100219782-100220326  
chr15-93141363-93141913  
chr6-42357275-42358117  
chr2-37625966-37626695  
chr6-107716004-107716243  
chr4-142405017-142407488  
chr1-35769253-35770301  
chr14-99260945-99261461  
chr10-27224831-27226477  
chr16-4474344-4474827  
chr2-161956468-161957097  
chr15-84761438-84762167  
chr5-132663125-132664515  
chr12-7989852-7990553  
chr6-13485975-13488543  
chr5-39176849-39179363  
chr20-5039100-5039866  
chr5-71600944-71601971  
chr8-128540427-128541376  
chr16-56643105-56643938  
chr3-27714725-27715503



chr12-51318681-51319412  
chr2-98472870-98474446  
chr7-100351805-100352888  
chr17-40326217-40326422  
chr2-168192897-168193735  
chr5-151078819-151079033  
chr4-152696756-152697524  
chrX-65750456-65751305  
chr11-68340402-68341313  
chr1-84996736-84999313  
chr14-100058713-100059146  
chr4-6690263-6690855  
chr10-17669391-17670077  
chr1-89719544-89719975  
chr17-3763358-3763719  
chr19-49560564-49560889  
chr3-161310523-161311589  
chr6-106114611-106114899  
chr17-17179376-17179793  
chr5-119367516-119368940  
chr7-156640125-156641419  
chr4-184417080-184418256  
chr6-129748248-129748934  
chr7-74093015-74095112  
chr7-50333241-50333687  
chr9-89418276-89419534  
chr2-87476292-87477452  
chr6-157460800-157462047  
chr11-117230229-117230994  
chr16-87853580-87854286  
chr20-62977531-62978433  
chr6-2940012-2940860  
chr8-25385009-25385650  
chr5-171985007-171985576  
chr12-31721810-31722718  
chr10-68471354-68472325  
chr1-10524974-10525873  
chr5-40386208-40386677  
chr16-80656373-80657131  
chr6-137588996-137589946  
chr17-47734587-47735033  
chr20-63730472-63731376  
chr2-38722190-38723027

chr3-177538483-177539797  
chr3-183427910-183429178  
chr16-30350262-30350853  
chr4-184420430-184421417  
chr14-22561636-22562556  
chr12-9760771-9761754  
chr11-82955747-82956554  
chr12-104671271-104672238  
chr17-14069030-14070040  
chr13-99382660-99384910  
chr6-16711645-16712145  
chr6-107726036-107727016  
chr9-130128122-130129576  
chr2-68203476-68204170  
chr7-102415465-102416350  
chr15-94272176-94273225  
chr12-89494413-89495143  
chr6-26271139-26271790  
chr7-121442884-121443143  
chr6-137269298-137269977  
chr9-5851044-5851854  
chr2-239363814-239364615  
chr16-70164992-70165650  
chr14-55332613-55333050  
chr16-11560411-11561572  
chr10-100510752-100511505  
chr9-129956681-129957201  
chr8-122918716-122919607  
chr2-27391121-27392299  
chr3-11291178-11291803  
chr5-172185175-172185366  
chr2-126659143-126659512  
chr20-5078011-5078962  
chr18-61892731-61894897  
chr8-125637178-125637987  
chr1-151056270-151056594  
chr14-61342346-61343112  
chr13-99403413-99404027  
chr16-89100045-89100284  
chr2-96324793-96326336  
chr16-16033106-16033913  
chr1-11934151-11935087  
chr1-19643749-19645214

chr1-198167060-198167969  
chr1-58812940-58813370  
chr20-49661627-49662312  
chr1-226722468-226723427  
chr6-142915419-142915620  
chr11-120210515-120211460  
chr1-92365534-92366527  
chr16-15907963-15908523  
chr7-150481265-150482204  
chr15-101979709-101981190  
chr4-148216581-148217581  
chr11-60971288-60972141  
chr17-47720901-47721581  
chr1-159826202-159827906  
chr6-490239-490861  
chr20-10673762-10675019  
chr10-114540875-114541919  
chr1-203625583-203627150  
chr7-150450010-150452045  
chr8-19475033-19475998  
chr3-177201739-177202181  
chr2-201126820-201127117  
chr2-241803288-241805231  
chr7-70595667-70596263  
chr19-4104573-4105412  
chr8-102782803-102783564  
chr8-19209232-19209856  
chr8-42355336-42356359  
chr15-69668141-69669528  
chr1-31939765-31940308  
chr7-152144440-152145386  
chr10-110414261-110415262  
chr17-30291042-30292495  
chr2-38875327-38876371  
chr18-12419760-12420611  
chr12-11981065-11981847  
chr2-169732870-169734581  
chr17-4696231-4697127  
chr14-91405138-91405845  
chr2-110675128-110675576  
chr12-10293279-10294105  
chr2-110846408-110847655  
chr13-113584216-113585005

chr9-126396770-126397646  
chr2-33275643-33276198  
chr1-212950208-212951308  
chrX-1467122-1467552  
chr8-29060562-29061854  
chr10-88831714-88832003  
chr7-75727718-75728527  
chr6-5518901-5519503  
chr2-233079453-233079825  
chr6-96836721-96838012  
chr7-3112598-3113173  
chr17-58328063-58330047  
chr7-24910798-24911571  
chr4-89290823-89291064  
chr3-16309628-16310054  
chr1-167446133-167446452  
chr10-96670565-96671789  
chr1-92484468-92486445  
chr3-49813174-49814302  
chr6-26240052-26241306  
chr1-116806116-116806853  
chr18-77124442-77125032  
chr5-157603233-157603915  
chr6-151690169-151691687  
chr12-75934244-75935068  
chr6-33578449-33579054  
chr16-27401751-27402707  
chr1-41806892-41807110  
chr10-11149306-11151154  
chr7-35729093-35729867  
chr14-99262149-99263032  
chr1-158930295-158931811  
chr12-121038622-121039529  
chr17-28726004-28727442  
chr10-62637000-62638381  
chr14-61379577-61380123  
chr8-125272971-125274164  
chr16-2065291-2065685  
chr7-75237466-75238278  
chr8-103445376-103446008  
chr6-158564941-158565223  
chr2-106095607-106097035  
chr5-39187984-39188668

chr10-72369957-72370862  
chr5-171418585-171420425  
chr8-127793934-127795972  
chrX-154712586-154713341  
chr5-177412580-177413080  
chr5-73095787-73096536  
chr11-36558363-36559345  
chr1-25031939-25032742  
chr1-160664543-160666292  
chr2-69650397-69650696  
chr14-49999224-49999701  
chr4-122458415-122459113  
chr3-5026191-5027254  
chr8-127980340-127981889  
chr6-117547572-117549948  
chr11-60994334-60995199  
chr16-10876439-10877613  
chr6-155174667-155175110  
chr1-204521075-204521690  
chr1-220056265-220056903  
chr1-168512990-168514782  
chr1-198649358-198650468  
chr4-26312228-26312837  
chr18-80172050-80172431  
chr6-34673137-34674227  
chr8-100493163-100493687  
chr11-35172954-35174367  
chr2-237475027-237476058  
chr19-16328199-16329442  
chr5-1518471-1519233  
chr20-10672570-10673004  
chr1-100028187-100029357  
chr7-116962090-116962843  
chr5-39211632-39212193  
chr7-2405863-2406324  
chr13-41811600-41812351  
chr5-40361475-40361750  
chr2-233990256-233991488  
chr2-136423333-136424509  
chr6-111846508-111847205  
chr20-51022815-51023532  
chr2-174675501-174676108  
chr8-74320497-74321973

chr10-69222027-69223177  
chr4-7863943-7865850  
chr16-30473475-30473997  
chr6-87742019-87742731  
chr15-51981676-51982644  
chr16-79599688-79601632  
chr12-107369519-107370071  
chr15-84736302-84736834  
chr2-196182219-196184326  
chr9-133370638-133371757  
chr11-107858064-107859991  
chr20-43949868-43950738  
chr19-18879411-18880267  
chr19-29587361-29588120  
chr8-102122681-102124565  
chr17-49387642-49388666  
chr7-141590523-141591159  
chr2-8301877-8302529  
chr2-111493489-111495432  
chr16-84518802-84519282  
chr17-78381608-78382190  
chr8-79692891-79693762  
chr10-3093154-3093772  
chr1-172778684-172779450  
chr13-40613060-40614028  
chr16-89331483-89331967  
chr17-68182601-68183517  
chr8-143950940-143951205  
chr7-30330317-30331205  
chr1-89721386-89721719  
chr9-126804667-126806197  
chr10-61942656-61944064  
chr10-24887309-24888277  
chr8-21918282-21918890  
chr2-237432528-237433252  
chr2-29314723-29315532  
chr8-19473352-19473729  
chr4-47010510-47011628  
chr1-100396578-100397433  
chr12-53205718-53206451  
chr19-35462366-35463298  
chr3-177426911-177427818  
chr9-74496604-74498799

chr2-233076762-233076989  
chr8-69832489-69835302  
chr8-27361967-27362522  
chr13-25017985-25018664  
chr9-121074253-121075741  
chr5-50489336-50490003  
chr15-85329466-85330552  
chr15-90574370-90574855  
chr19-6669351-6670486  
chr6-53302704-53303965  
chr1-113783322-113784633  
chr12-64657596-64658898  
chr16-66522162-66522487  
chr13-30374358-30374853  
chr8-133066128-133066451  
chr11-88301170-88302105  
chr1-199173009-199173897  
chr21-43864939-43867147  
chr2-69946378-69947233  
chr17-80764661-80765882  
chr6-27830686-27831860  
chr2-197304575-197305034  
chr10-17428232-17429431  
chr6-26196756-26197818  
chr3-122077047-122078135  
chr11-61293898-61295623  
chr17-35537457-35537923  
chr3-10460052-10460653  
chr10-84330241-84330596  
chr4-83231434-83232263  
chr17-42287089-42289678  
chr16-87777668-87778133  
chr14-101819410-101820030  
chr8-119855303-119856542  
chr5-149729952-149732324  
chr1-53600349-53601018  
chr7-35806893-35807493  
chr15-75836733-75837526  
chr12-68450794-68452118  
chr1-145690376-145691346  
chr7-29194380-29195700  
chr10-14184843-14186059  
chr6-139530689-139531453

chr1-205440518-205441626  
chr11-115214563-115215289  
chr1-203628870-203630101  
chr2-9752492-9753773  
chr17-75875975-75876875  
chr3-111543912-111544257  
chr7-151408593-151409516  
chr3-16311700-16312586  
chr15-91857460-91858195  
chr16-27446634-27447213  
chr17-77462100-77462440  
chr1-183956320-183957162  
chr14-55098037-55098683  
chr1-203606913-203607727  
chr7-2120020-2120776  
chr13-40115928-40116523  
chr9-277516-279075  
chr4-121189649-121190474  
chr3-136919663-136920181  
chr6-137715429-137716310  
chr2-241771926-241772479  
chr3-73028889-73029672  
chr17-5468021-5469446  
chr6-42565336-42565706  
chr11-12235785-12236933  
chr1-54474658-54476461  
chr12-122244050-122245516  
chr19-10412332-10412630  
chr16-10878609-10879201  
chr12-12379651-12380582  
chr6-85669564-85670296  
chr1-3787347-3788069  
chr17-65173271-65174090  
chr12-47390859-47392161  
chr20-52031445-52032408  
chr1-20152087-20152754  
chr22-39013762-39014753  
chr6-158535978-158537631  
chr20-3157202-3157846  
chr7-92717749-92718848  
chr22-37238351-37238976  
chr11-115504001-115505069  
chr2-26068523-26069044



chr9-113520271-113520629  
chr7-2698740-2699566  
chr12-42325716-42327199  
chr8-98944108-98945637  
chr9-41234432-41235016  
chr2-9738522-9739860  
chr8-81096973-81097874  
chr11-68038811-68039471  
chr7-2893548-2895088  
chr11-119262776-119263976  
chr20-24960428-24961587  
chr9-36572386-36573761  
chr7-35723045-35723338  
chr20-51497510-51498367  
chr1-58941442-58943163  
chr17-50508034-50508881  
chr1-223726429-223727275  
chr12-6446376-6447040  
chr6-137816159-137816523  
chr7-33040613-33041398  
chr1-172818387-172819706  
chr2-8457067-8458107  
chr5-143693697-143694728  
chr7-126701083-126701524  
chr2-44941237-44942677  
chr13-45367223-45367984  
chr10-50671847-50672764  
chr1-89278647-89279691  
chr16-87895521-87896493  
chr10-26447278-26447793  
chr18-56709475-56709851  
chr4-4541081-4542573  
chr12-47207114-47208436  
chr15-52545916-52546855  
chr17-36107529-36107988  
chr5-139635827-139638732  
chr16-3625930-3626817  
chr16-78770327-78771036  
chr14-54881248-54882410  
chr1-24416782-24417193  
chr6-130138194-130139123  
chr16-57764366-57765193  
chr12-104687638-104688450

chr17-76383068-76385314  
chrX-147917731-147918827  
chr22-46613730-46615041  
chr12-122161640-122162186  
chr6-35302594-35303525  
chr8-38030061-38031661  
chr21-38244617-38245440  
chr6-106103583-106104261  
chr1-211326417-211327968  
chr2-102417748-102418955  
chr7-100221049-100221915  
chr10-100266917-100268122  
chr17-47732840-47734090  
chr20-51500894-51501438  
chr1-111221502-111222441  
chr5-912249-913001  
chr1-198936639-198937746  
chr13-25901630-25902151  
chr22-39316402-39316818  
chr1-12178968-12179523  
chr14-65791342-65792171  
chr14-61350462-61351201  
chr6-157535629-157536480  
chr2-229714172-229715592  
chr14-55337477-55338368  
chr9-132350885-132351270  
chr11-128628185-128629052  
chr3-11641766-11644108  
chr17-48429116-48430639  
chr20-43666482-43667467  
chr7-131235535-131236133  
chr13-33786694-33787721  
chr15-60584443-60585094  
chr1-116377577-116378403  
chr14-99235015-99235996  
chr2-144508136-144508781  
chr2-9843044-9844202  
chr5-157180356-157181248  
chr13-50911850-50912322  
chr12-122227470-122227772  
chr15-31367612-31367989  
chr3-187918800-187920014  
chr3-121431871-121432497

chr2-84782035-84783532  
chr12-108635260-108636043  
chr19-45087543-45087897  
chr22-44023761-44024856  
chr7-4744458-4746497  
chr8-100443001-100444223  
chr11-63531278-63532113  
chr12-14410979-14411510  
chr3-15054998-15055541  
chr11-122981537-122982210  
chr14-61403334-61403994  
chr22-20556402-20558233  
chr2-8477354-8478577  
chr9-130007378-130007989  
chr2-12727840-12728957  
chr11-128464965-128465923  
chr20-51416446-51417364  
chr5-143229430-143230583  
chr2-61016795-61018432  
chr19-3132993-3133904  
chr21-33238044-33240068  
chr14-99246596-99247618  
chr6-150068380-150069591  
chr1-228646615-228648301  
chr22-22752632-22753994  
chr5-76542805-76543690  
chr17-49208959-49211038  
chr19-6521839-6522792  
chr7-104956922-104957752  
chr2-234483202-234484440  
chr9-5841439-5842424  
chr1-211675184-211676146  
chr3-114221397-114222118  
chrX-71619144-71619544  
chr9-126516934-126517793  
chr18-3605771-3606482  
chr3-111616337-111617018  
chr10-26486980-26487842  
chr2-130824152-130825055  
chr6-25137487-25138996  
chr2-168489998-168491297  
chr3-172523017-172524028  
chr15-31345326-31345799

chr9-33164466-33164683  
chr10-110859778-110861231  
chr9-128030991-128031392  
chr15-22220933-22221823  
chr3-142269843-142271005  
chr16-11258770-11259000  
chr3-48663545-48664401  
chr13-78602347-78603976  
chr11-85823627-85824495  
chr18-51191174-51191685  
chr16-23504186-23505383  
chrX-153985380-153985957  
chr19-610063-611838  
chr1-172646843-172647550  
chr6-42774873-42775573  
chr1-55127714-55128933  
chr13-114130849-114131706  
chr15-85646357-85647263  
chr1-169667085-169668127  
chr9-5885910-5886702  
chr5-151138871-151139841  
chr17-77331349-77333169  
chr17-64968771-64969391  
chr16-30407001-30407904  
chr10-73729659-73730868  
chr17-80471846-80472272  
chr10-17509044-17509507  
chr5-87340386-87341141  
chr14-61444126-61444701  
chr1-38046391-38047612  
chr6-118796429-118797111  
chr6-166418899-166419748  
chr2-106094076-106094879  
chr17-77441168-77442093  
chr6-73309433-73310700  
chr1-151945498-151946678  
chr19-543484-544442  
chr4-1203654-1203925  
chr2-216015856-216016400  
chr14-61471698-61472504  
chr14-58151479-58152744  
chr17-68346315-68347058  
chr1-172670326-172671182

chr16-57577746-57578485  
chr22-46612848-46613543  
chr9-123637716-123638680  
chr2-224927604-224928418  
chr1-53738741-53739572  
chr12-120959657-120960438  
chr19-2620630-2621344  
chr22-30425808-30426916  
chr3-71066457-71066671  
chr10-6578168-6578842  
chr5-107570935-107572484  
chr7-77351320-77352173  
chr16-85612796-85613521  
chr9-137034647-137035638  
chr4-10095706-10096856  
chr5-132103383-132104314  
chr6-105994069-105995267  
chr11-63866146-63866799  
chr20-35283766-35285233  
chrX-24693424-24694322  
chr8-29049977-29050582  
chr4-88007205-88008781  
chr18-77073604-77074279  
chr20-53608655-53610301  
chrX-154372686-154372916  
chr13-97226848-97227489  
chr6-33579570-33580641  
chr7-5531835-5532228  
chr8-9011734-9012460  
chr9-120928442-120929517  
chr4-48129435-48130023  
chr6-138161074-138162620  
chr11-64206385-64208298  
chr5-88140925-88142053  
chr13-98476217-98477015  
chr11-128492681-128493685  
chr4-26884055-26885685  
chr12-6631482-6632724  
chr11-35077650-35078594  
chr22-36376931-36378005  
chr1-169694375-169694890  
chr20-48826825-48828609  
chr1-160797870-160798280

chr14-105857649-105858587  
chr4-77852902-77853557  
chr1-40059328-40060688  
chr12-120007044-120007811  
chr12-64458883-64460049  
chr12-111429947-111431245  
chr8-116437178-116438557  
chr1-116389363-116390620  
chr17-80254684-80255227  
chr12-6866975-6868335  
chr4-1267283-1268225  
chr5-142015085-142016450  
chr2-96343893-96344531  
chr2-39128951-39129383  
chr10-33008644-33009253  
chr22-23216121-23217042  
chr1-160432349-160432971  
chr12-92539077-92541223  
chr17-35930445-35931133  
chr17-50943773-50945140  
chr2-196177734-196178377  
chr1-204564759-204566283  
chr17-64708601-64709452  
chr14-35533204-35535765  
chr3-14424508-14425239  
chrX-71533796-71534571  
chr6-111844456-111845227  
chr1-167627677-167628750  
chr1-67194122-67195288  
chr15-40753973-40754378  
chr1-160767079-160768789  
chr6-16483250-16483940  
chr1-230123037-230124195  
chr20-59163494-59164215  
chr2-73293264-73294001  
chr1-16420554-16421453  
chr2-54559826-54560844  
chr6-125918616-125919590  
chr6-25034420-25036517  
chr18-32040423-32041546  
chr18-80175145-80176077  
chr7-50610391-50611145  
chr1-212595840-212596923

chr13-48403159-48404198  
chr19-13167372-13168254  
chr16-11584084-11587626  
chr7-130938339-130938995  
chr11-61567110-61567789  
chr19-50325624-50325853  
chr18-48948516-48950153  
chr1-89670062-89670513  
chr14-106174272-106174814  
chr14-80941208-80942571  
chr1-92482944-92484024  
chr6-137717358-137717890  
chr10-22633932-22634508  
chr8-100258389-100259420  
chr12-53208854-53209408  
chr1-160707395-160707848  
chr22-36364819-36365430  
chr3-71226221-71227605  
chr9-89448413-89448849  
chr18-13376108-13377773  
chr14-106510863-106511634  
chr17-2222861-2223684  
chr9-19183921-19184872  
chr20-53751019-53751899  
chr2-195532349-195533261  
chr12-25241006-25241922  
chr1-6259772-6261369  
chr4-89316316-89317490  
chr17-68356210-68357251  
chr17-75242175-75243013  
chr11-65575464-65576116  
chr19-41887046-41888287  
chr16-30470965-30471393  
chr2-233083932-233085005  
chr2-96485746-96486649  
chr3-45664324-45665662  
chr12-113135422-113136505  
chr12-122901355-122901991  
chr2-25314276-25315033  
chr20-35251825-35252798  
chr10-6052479-6053080  
chr2-37623976-37624798  
chrX-119955810-119956901

chr18-80246769-80247930  
chr9-121132863-121133716  
chr12-110562038-110563673  
chr14-91867008-91867876  
chr11-126355122-126356890  
chr9-89463792-89464956  
chr8-127975549-127976205  
chr19-16594093-16595413  
chr10-79317367-79318319  
chr14-23988267-23989356  
chr9-136996325-136996870  
chr15-76994706-76995705  
chr22-36379420-36379964  
chr2-131153735-131154569  
chr1-184973396-184974763  
chr13-79194185-79194968  
chr8-33471801-33473607  
chr8-129885435-129887130  
chr9-89443991-89444664  
chr1-89854303-89856339  
chr11-414449-415532  
chr1-23612948-23614382  
chr1-42936707-42937506  
chr2-8544866-8545508  
chr19-8268566-8269689  
chr2-105795749-105796558  
chr13-27361872-27362614  
chr11-65431407-65431733  
chr6-11224273-11225482  
chr14-91869825-91870419  
chr17-19063237-19064542  
chr20-17530551-17531720  
chr11-313857-314966  
chr8-27325174-27327254  
chr5-139392281-139393447  
chr4-83125647-83126219  
chr8-66534998-66536133  
chr15-50247580-50248604  
chr9-130039556-130040011  
chr19-38735958-38736421  
chr8-125644260-125644968  
chr1-160738943-160739520  
chr19-1408496-1409043



chr2-144517127-144517992  
chr10-3095377-3096490  
chr15-78067880-78069338  
chr12-89880488-89881320  
chr6-73262542-73263698  
chr16-22357405-22358462  
chr6-35919633-35921414  
chr2-10122402-10123002  
chr14-92585600-92587586  
chr17-48439664-48440500  
chr2-97745508-97746058  
chr22-49961958-49962799  
chr1-44813585-44814106  
chr16-30458591-30459343  
chr8-143558044-143559062  
chr20-32249078-32249833  
chr3-14425768-14426473  
chr16-8891271-8892174  
chr7-2521870-2522593  
chr6-166244088-166245174  
chr7-50340018-50340538  
chr3-154120942-154122706  
chr7-50352128-50352665  
chr16-22436518-22438042  
chr17-78186473-78187565  
chr2-102355500-102356566  
chr10-91796339-91797075  
chr2-96321034-96322363  
chr13-40984723-40985264  
chr5-131271963-131273064  
chr16-88633633-88635135  
chr19-11639434-11640319  
chr19-18119145-18120076  
chr15-84734788-84736017  
chr3-191328577-191330270  
chr18-9116823-9117660  
chr4-15778020-15779790  
chr14-105473712-105474904  
chr14-91388311-91389034  
chr15-40047450-40048722  
chr19-3178360-3179809  
chr15-75130724-75131650  
chr19-2327583-2329020

chr7-139104191-139105249  
chr20-41047711-41049315  
chr12-121658446-121659576  
chr6-33633359-33634253  
chr17-77453521-77454203  
chr11-63813014-63814222  
chr7-6105692-6106721  
chr17-39867140-39868202  
chr19-10408583-10409290  
chr6-108895590-108896707  
chr1-234925943-234927397  
chr12-27332584-27333855  
chr22-36386504-36387320

| <b>Cluster</b> | <b>Genes</b> |
|----------------|--------------|
| CD4 CTL        | PDGFD        |
| CD4 CTL        | CX3CR1       |
| CD4 CTL        | ADGRG1       |
| CD4 CTL        | FCRL6        |
| CD4 CTL        | C1orf21      |
| CD4 CTL        | PRSS23       |
| CD4 CTL        | TMCC3        |
| CD4 CTL        | S1PR5        |
| CD4 CTL        | ASCL2        |
| CD4 CTL        | CCL4         |
| CD4 CTL        | XCL2         |
| CD4 CTL        | FGFBP2       |
| CD4 CTL        | SLAMF7       |
| CD4 CTL        | EOMES        |
| CD4 CTL        | GZMH         |
| CD4 CTL        | CES1         |
| CD4 CTL        | TGFBR3       |
| CD4 CTL        | NKG7         |
| CD4 CTL        | GZMM         |
| CD4 CTL        | CCL5         |
| CD4 CTL        | B2M          |
| CD4 CTL        | CST7         |
| CD4 CTL        | ENC1         |
| CD4 CTL        | HCST         |
| CD4 CTL        | FGR          |
| CD4 CTL        | HBA1         |
| CD4 CTL        | MAP3K8       |
| CD4 CTL        | EFHD2        |
| CD4 CTL        | SPON2        |
| CD4 CTL        | PROK2        |
| CD4 Naive      | NOG          |
| CD4 Naive      | LRRN3        |
| CD4 Naive      | SCML1        |
| CD4 Naive      | CCR7         |
| CD4 Naive      | AIF1         |
| CD4 Naive      | TRABD2A      |
| CD4 Naive      | BCL11B       |
| CD4 Naive      | ABLIM1       |
| CD4 Naive      | TMIGD2       |
| CD4 Naive      | AK5          |
| CD4 Naive      | IL6ST        |
| CD4 Naive      | RPL11        |

|                   |         |
|-------------------|---------|
| CD4 Naive         | OXNAD1  |
| CD4 Naive         | SOX4    |
| CD4 Naive         | SATB1   |
| CD4 Naive         | BACH2   |
| CD4 Naive         | LEF1    |
| CD4 Naive         | RETREG1 |
| CD4 Proliferating | DTL     |
| CD4 Proliferating | E2F8    |
| CD4 Proliferating | CDC45   |
| CD4 Proliferating | CDT1    |
| CD4 Proliferating | DLGAP5  |
| CD4 Proliferating | TK1     |
| CD4 Proliferating | HJURP   |
| CD4 Proliferating | CDCA2   |
| CD4 Proliferating | MCM10   |
| CD4 Proliferating | TROAP   |
| CD4 Proliferating | RRM2    |
| CD4 Proliferating | ANLN    |
| CD4 Proliferating | KIF4A   |
| CD4 Proliferating | MYBL2   |
| CD4 Proliferating | PKMYT1  |
| CD4 Proliferating | CDCA5   |
| CD4 Proliferating | TYMS    |
| CD4 Proliferating | E2F7    |
| CD4 Proliferating | CCNB2   |
| CD4 Proliferating | NUSAP1  |
| CD4 Proliferating | MKI67   |
| CD4 Proliferating | BIRC5   |
| CD4 Proliferating | DSCC1   |
| CD4 Proliferating | PCLAF   |
| CD4 Proliferating | GTSE1   |
| CD4 Proliferating | CDK1    |
| CD4 Proliferating | UHRF1   |
| CD4 Proliferating | KIF15   |
| CD4 Proliferating | PCNA    |
| CD4 Proliferating | STMN1   |
| CD4 TCM_0         | TSHZ2   |
| CD4 TCM_0         | RPS27   |
| CD4 TCM_0         | CCR7    |
| CD4 TCM_0         | PASK    |
| CD4 TCM_0         | TCF7    |
| CD4 TCM_0         | RPL32   |
| CD4 TCM_0         | IL6ST   |

|           |          |
|-----------|----------|
| CD4 TCM_0 | ADTRP    |
| CD4 TCM_0 | FYB1     |
| CD4 TCM_0 | SELL     |
| CD4 TCM_0 | SESN3    |
| CD4 TCM_0 | MAL      |
| CD4 TCM_0 | SEC11C   |
| CD4 TCM_0 | MYH9     |
| CD4 TCM_0 | DHRS7    |
| CD4 TCM_0 | CCND2    |
| CD4 TCM_0 | PFDN2    |
| CD4 TCM_0 | SSBP4    |
| CD4 TCM_0 | PBXIP1   |
| CD4 TCM_0 | JPT1     |
| CD4 TCM_0 | ATP2B1   |
| CD4 TCM_0 | TMEM50A  |
| CD4 TCM_0 | HLA-B    |
| CD4 TCM_0 | ELOVL5   |
| CD4 TCM_1 | NEFL     |
| CD4 TCM_1 | LMNA     |
| CD4 TCM_1 | FXYD7    |
| CD4 TCM_1 | RCBTB2   |
| CD4 TCM_1 | GATA3    |
| CD4 TCM_1 | FXYD1    |
| CD4 TCM_1 | LPAR6    |
| CD4 TCM_1 | LMO4     |
| CD4 TCM_1 | VIM      |
| CD4 TCM_1 | C1orf162 |
| CD4 TCM_1 | CAPG     |
| CD4 TCM_1 | NR3C1    |
| CD4 TCM_1 | FXYD5    |
| CD4 TCM_1 | PLP2     |
| CD4 TCM_1 | ANKRD28  |
| CD4 TCM_1 | CD82     |
| CD4 TCM_1 | CRIP2    |
| CD4 TCM_1 | PTGER4   |
| CD4 TCM_1 | GLIPR1   |
| CD4 TCM_1 | INPP4B   |
| CD4 TCM_1 | ANXA1    |
| CD4 TCM_1 | ARHGAP15 |
| CD4 TCM_1 | KRT1     |
| CD4 TCM_1 | MDFIC    |
| CD4 TCM_1 | TIMP1    |
| CD4 TCM_1 | TOB1     |

|           |          |
|-----------|----------|
| CD4 TCM_1 | AHNAK    |
| CD4 TCM_1 | ZFP36L2  |
| CD4 TCM_1 | PAG1     |
| CD4 TCM_2 | FYB1     |
| CD4 TCM_2 | GYPC     |
| CD4 TCM_2 | CORO1B   |
| CD4 TCM_2 | CNN2     |
| CD4 TCM_2 | OPTN     |
| CD4 TCM_2 | LAPTM5   |
| CD4 TCM_2 | ACTG1    |
| CD4 TCM_2 | GMFG     |
| CD4 TCM_2 | ITGB1    |
| CD4 TCM_2 | UCP2     |
| CD4 TCM_2 | C16orf87 |
| CD4 TCM_2 | TMSB10   |
| CD4 TCM_2 | LAT      |
| CD4 TCM_2 | EML4     |
| CD4 TCM_2 | CD28     |
| CD4 TCM_2 | LGALS9   |
| CD4 TCM_2 | EPSTI1   |
| CD4 TCM_2 | MAF      |
| CD4 TCM_2 | SAT1     |
| CD4 TCM_2 | PPP1CC   |
| CD4 TCM_2 | MXD4     |
| CD4 TCM_2 | EVI2B    |
| CD4 TCM_2 | COTL1    |
| CD4 TCM_2 | JAK3     |
| CD4 TCM_2 | CAPZB    |
| CD4 TCM_2 | SLC4A7   |
| CD4 TCM_2 | PBXIP1   |
| CD4 TCM_2 | OCIAD2   |
| CD4 TCM_2 | EIF3A    |
| CD4 TCM_3 | KLRB1    |
| CD4 TCM_3 | PDE4D    |
| CD4 TCM_3 | RPS19    |
| CD4 TCM_3 | USP10    |
| CD4 TCM_3 | LTB      |
| CD4 TCM_3 | DPP4     |
| CD4 TCM_3 | CMTM6    |
| CD4 TCM_3 | AQP3     |
| CD4 TCM_3 | TNFRSF4  |
| CD4 TEM_0 | ITGA4    |
| CD4 TEM_0 | KLRB1    |

|           |          |
|-----------|----------|
| CD4 TEM_0 | TMEM156  |
| CD4 TEM_0 | DYNLT3   |
| CD4 TEM_0 | SERINC5  |
| CD4 TEM_0 | RPS6     |
| CD4 TEM_0 | TCF7     |
| CD4 TEM_0 | MGAT4A   |
| CD4 TEM_0 | LIMS1    |
| CD4 TEM_0 | INPP4B   |
| CD4 TEM_0 | EEF1B2   |
| CD4 TEM_0 | IL7R     |
| CD4 TEM_0 | GPR183   |
| CD4 TEM_0 | LTB      |
| CD4 TEM_0 | ANKRD12  |
| CD4 TEM_0 | ITGA4    |
| CD4 TEM_0 | TCF7     |
| CD4 TEM_0 | STK17A   |
| CD4 TEM_0 | SERINC5  |
| CD4 TEM_0 | GCC2     |
| CD4 TEM_0 | OXNAD1   |
| CD4 TEM_0 | CCL5     |
| CD4 TEM_0 | AP3M2    |
| CD4 TEM_0 | ATM      |
| CD4 TEM_0 | FYN      |
| CD4 TEM_0 | FYB1     |
| CD4 TEM_0 | LEF1     |
| CD4 TEM_0 | FOXP1    |
| CD4 TEM_0 | ATXN7L3B |
| CD4 TEM_0 | NUCB2    |
| CD4 TEM_0 | CCR7     |
| CD4 TEM_0 | PIK3R1   |
| CD4 TEM_0 | ETS1     |
| CD4 TEM_0 | STK17B   |
| CD4 TEM_0 | TRA2A    |
| CD4 TEM_0 | DNMT3A   |
| CD4 TEM_0 | MCUB     |
| CD4 TEM_0 | H1FX     |
| CD4 TEM_0 | PPP2R5C  |
| CD4 TEM_0 | DHX36    |
| CD4 TEM_0 | N4BP2L2  |
| CD4 TEM_0 | PTP4A2   |
| CD4 TEM_0 | ARID5B   |
| CD4 TEM_0 | YPEL5    |
| CD4 TEM_0 | CLEC2D   |

|           |          |
|-----------|----------|
| CD4 TEM_0 | EMB      |
| CD4 TEM_0 | PIK3IP1  |
| CD4 TEM_0 | CBLB     |
| CD4 TEM_1 | GZMK     |
| CD4 TEM_1 | LYAR     |
| CD4 TEM_1 | DUSP2    |
| CD4 TEM_1 | GZMA     |
| CD4 TEM_1 | ZFP36L2  |
| CD4 TEM_1 | MT-ND3   |
| CD4 TEM_1 | ID2      |
| CD4 TEM_1 | TNFAIP3  |
| CD4 TEM_1 | XCL1     |
| CD4 TEM_1 | BTG1     |
| CD4 TEM_1 | HCST     |
| CD4 TEM_1 | PIK3R1   |
| CD4 TEM_1 | CCL5     |
| CD4 TEM_1 | GZMM     |
| CD4 TEM_1 | HOPX     |
| CD4 TEM_1 | CXCR4    |
| CD4 TEM_1 | CEBPB    |
| CD4 TEM_1 | KLRB1    |
| CD4 TEM_1 | PDCD4    |
| CD4 TEM_1 | SYNE2    |
| CD4 TEM_1 | HNRNPLL  |
| CD4 TEM_1 | IL7R     |
| CD4 TEM_1 | PARP8    |
| CD4 TEM_2 | NPTX1    |
| CD4 TEM_2 | COL24A1  |
| CD4 TEM_2 | ZNF462   |
| CD4 TEM_2 | CD79A    |
| CD4 TEM_2 | LTB      |
| CD4 TEM_2 | JUNB     |
| CD4 TEM_2 | PLXNA4   |
| CD4 TEM_2 | CD55     |
| CD4 TEM_2 | ARL4C    |
| CD4 TEM_2 | SOCS3    |
| CD4 TEM_2 | TPT1     |
| CD4 TEM_2 | CR1      |
| CD4 TEM_2 | JUND     |
| CD4 TEM_2 | ARHGAP15 |
| CD4 TEM_2 | RPL19    |
| CD4 TEM_2 | UBA52    |
| CD4 TEM_2 | PRKD3    |



|           |            |
|-----------|------------|
| CD4 TEM_2 | AC004086.1 |
| CD4 TEM_2 | IRF2BP2    |
| CD4 TEM_2 | BTG2       |
| CD4 TEM_2 | RPL8       |
| CD4 TEM_2 | TIMP1      |
| CD4 TEM_2 | NFKBIA     |
| CD4 TEM_2 | HNRNPA1    |
| CD4 TEM_2 | BCL2       |
| CD4 TEM_2 | RPS14      |
| CD4 TEM_2 | NACA       |
| Treg      | FANK1      |
| Treg      | FOXP3      |
| Treg      | HACD1      |
| Treg      | FCRL3      |
| Treg      | CCDC141    |
| Treg      | C15orf53   |
| Treg      | IL2RA      |
| Treg      | IKZF2      |
| Treg      | CPNE2      |
| Treg      | DUSP4      |
| Treg      | RTKN2      |
| Treg      | TTN        |
| Treg      | STAM       |
| Treg      | LGALS3     |
| Treg      | TIGIT      |
| Treg      | HPGD       |
| Treg      | TBC1D4     |
| Treg      | SETD7      |
| Treg      | CTLA4      |
| Treg      | CCNG2      |
| Treg      | UBL3       |
| Treg      | RGS1       |
| Treg      | HLA-DQB1   |
| Treg      | TTC39C     |
| Treg      | PMAIP1     |
| Treg      | TCEAL4     |
| Treg      | USP15      |
| Treg      | SAMHD1     |
| Treg      | CASK       |
| Treg      | TULP4      |
| CD8 Naive | LRRN3      |
| CD8 Naive | AK5        |
| CD8 Naive | SCML1      |

|           |          |
|-----------|----------|
| CD8 Naive | TMIGD2   |
| CD8 Naive | CLEC11A  |
| CD8 Naive | EIF3E    |
| CD8 Naive | CCR7     |
| CD8 Naive | RPL23    |
| CD8 Naive | ACTN1    |
| CD8 Naive | TRABD2A  |
| CD8 Naive | MAL      |
| CD8 Naive | S100B    |
| CD8 Naive | ARMH1    |
| CD8 Naive | FHIT     |
| CD8 Naive | IL6ST    |
| CD8 Naive | SATB1    |
| CD8 Naive | AIF1     |
| CD8 Naive | NDFIP1   |
| CD8 Naive | KLF7     |
| CD8 Naive | OXNAD1   |
| CD8 Naive | ABLIM1   |
| CD8 Naive | PDK1     |
| CD8 Naive | LEF1     |
| CD8 Naive | MYC      |
| CD8 Naive | TTN      |
| CD8 Naive | RUNX2    |
| CD8 Naive | RETREG1  |
| CD8 Naive | SNHG32   |
| CD8 Naive | RCAN3    |
| CD8 Naive | ITGA6    |
| CD8 TCM   | NT5E     |
| CD8 TCM   | SPINK2   |
| CD8 TCM   | IL7R     |
| CD8 TCM   | BIRC3    |
| CD8 TCM   | ITGA1    |
| CD8 TCM   | TMIGD2   |
| CD8 TCM   | TNFRSF25 |
| CD8 TCM   | CDC14A   |
| CD8 TCM   | SPRY1    |
| CD8 TCM   | TTC39C   |
| CD8 TCM   | TMEM123  |
| CD8 TCM   | ITM2C    |
| CD8 TCM   | PAG1     |
| CD8 TCM   | JUN      |
| CD8 TCM   | ARHGAP15 |
| CD8 TCM   | RCAN3    |

|           |          |
|-----------|----------|
| CD8 TCM   | ODF2L    |
| CD8 TCM   | MDFIC    |
| CD8 TCM   | FOSB     |
| CD8 TCM   | KLRC1    |
| CD8 TCM   | SERINC5  |
| CD8 TCM   | LTB      |
| CD8 TCM   | KLF6     |
| CD8 TCM   | KLRB1    |
| CD8 TCM   | SH3YL1   |
| CD8 TCM   | RORA     |
| CD8 TCM   | MAL      |
| CD8 TCM   | TCF7     |
| CD8 TCM   | IRS2     |
| CD8 TCM   | FOS      |
| CD8 TEM_0 | AKR1C3   |
| CD8 TEM_0 | FGFBP2   |
| CD8 TEM_0 | PROK2    |
| CD8 TEM_0 | SPON2    |
| CD8 TEM_0 | GZMH     |
| CD8 TEM_0 | B2M      |
| CD8 TEM_0 | CD8A     |
| CD8 TEM_0 | ADGRG1   |
| CD8 TEM_0 | ITGAL    |
| CD8 TEM_0 | PRSS23   |
| CD8 TEM_0 | CES1     |
| CD8 TEM_0 | LAIR2    |
| CD8 TEM_0 | MAF      |
| CD8 TEM_0 | PSTPIP2  |
| CD8 TEM_0 | SH3BGRL3 |
| CD8 TEM_0 | CD3G     |
| CD8 TEM_0 | ADRB2    |
| CD8 TEM_0 | VCL      |
| CD8 TEM_0 | RAP2A    |
| CD8 TEM_0 | S100A4   |
| CD8 TEM_0 | PLEKHF1  |
| CD8 TEM_0 | HLA-B    |
| CD8 TEM_0 | RAP1B    |
| CD8 TEM_0 | ID2      |
| CD8 TEM_0 | CST7     |
| CD8 TEM_0 | FNDC3B   |
| CD8 TEM_0 | ZFYVE28  |
| CD8 TEM_0 | PTPRC    |
| CD8 TEM_0 | PTCH1    |

|           |            |
|-----------|------------|
| CD8 TEM_0 | HBA1       |
| CD8 TEM_1 | CD160      |
| CD8 TEM_1 | CMC1       |
| CD8 TEM_1 | GZMM       |
| CD8 TEM_1 | KLRF1      |
| CD8 TEM_1 | KLRB1      |
| CD8 TEM_1 | AOAH       |
| CD8 TEM_1 | APMAP      |
| CD8 TEM_1 | PTP4A2     |
| CD8 TEM_1 | STAT4      |
| CD8 TEM_1 | CCL3       |
| CD8 TEM_1 | CD81       |
| CD8 TEM_1 | TSEN54     |
| CD8 TEM_1 | EOMES      |
| CD8 TEM_1 | XCL2       |
| CD8 TEM_1 | PYHIN1     |
| CD8 TEM_1 | CCL4       |
| CD8 TEM_1 | HBA1       |
| CD8 TEM_1 | DTHD1      |
| CD8 TEM_1 | FYN        |
| CD8 TEM_1 | C1orf21    |
| CD8 TEM_1 | S1PR5      |
| CD8 TEM_1 | NCOA1      |
| CD8 TEM_1 | KDELR2     |
| CD8 TEM_1 | JAZF1      |
| CD8 TEM_1 | ZEB2       |
| CD8 TEM_1 | PARP15     |
| CD8 TEM_1 | PTPN12     |
| CD8 TEM_1 | GNG2       |
| CD8 TEM_1 | ZBTB38     |
| CD8 TEM_1 | CDKN2D     |
| CD8 TEM_2 | NCAM1      |
| CD8 TEM_2 | GNLY       |
| CD8 TEM_2 | TYROBP     |
| CD8 TEM_2 | HOPX       |
| CD8 TEM_2 | CD63       |
| CD8 TEM_2 | COL6A2     |
| CD8 TEM_2 | AC005747.1 |
| CD8 TEM_2 | KLRC2      |
| CD8 TEM_2 | MXRA7      |
| CD8 TEM_2 | AHNAK      |
| CD8 TEM_2 | RRBP1      |
| CD8 TEM_2 | TBX21      |

|           |          |
|-----------|----------|
| CD8 TEM_2 | IFITM2   |
| CD8 TEM_2 | GSAP     |
| CD8 TEM_2 | MT-ND5   |
| CD8 TEM_2 | AGPAT4   |
| CD8 TEM_2 | ITGB1    |
| CD8 TEM_2 | ITGAM    |
| CD8 TEM_2 | TNFRSF18 |
| CD8 TEM_2 | CTSW     |
| CD8 TEM_2 | FAM129A  |
| CD8 TEM_2 | DSTN     |
| CD8 TEM_2 | SYTL3    |
| CD8 TEM_2 | KIR2DL1  |
| CD8 TEM_2 | MATK     |
| CD8 TEM_2 | ZBTB7A   |
| CD8 TEM_2 | KLRF1    |
| CD8 TEM_2 | S100A10  |
| CD8 TEM_2 | KIR3DL2  |
| CD8 TEM_2 | CD247    |
| CD8 TEM_3 | GZMK     |
| CD8 TEM_3 | DUSP2    |
| CD8 TEM_3 | RGS1     |
| CD8 TEM_3 | CMC1     |
| CD8 TEM_3 | CXCR4    |
| CD8 TEM_3 | YBX3     |
| CD8 TEM_3 | PHACTR2  |
| CD8 TEM_3 | SELENOM  |
| CD8 TEM_3 | BTG1     |
| CD8 TEM_3 | CRTAM    |
| CD8 TEM_3 | DNAJB1   |
| CD8 TEM_3 | FCRL3    |
| CD8 TEM_3 | TENT5C   |
| CD8 TEM_3 | ZFP36L2  |
| CD8 TEM_3 | PDCD4    |
| CD8 TEM_3 | RPS27    |
| CD8 TEM_3 | PIK3R1   |
| CD8 TEM_3 | MAP3K8   |
| CD8 TEM_3 | CD160    |
| CD8 TEM_3 | PDE4B    |
| CD8 TEM_3 | IFNGR1   |
| CD8 TEM_3 | CD69     |
| CD8 TEM_3 | FYN      |
| CD8 TEM_3 | CD74     |
| CD8 TEM_3 | TSPYL2   |

|           |         |
|-----------|---------|
| CD8 TEM_3 | JUNB    |
| CD8 TEM_3 | LYST    |
| CD8 TEM_3 | GPR183  |
| CD8 TEM_3 | CD84    |
| CD8 TEM_3 | SH2D1A  |
| CD8 TEM_4 | SOX4    |
| CD8 TEM_4 | SPINT2  |
| CD8 TEM_4 | IGHD    |
| CD8 TEM_4 | RTKN2   |
| CD8 TEM_4 | IFITM3  |
| CD8 TEM_4 | IRF2BP2 |
| CD8 TEM_4 | ZFP36L2 |
| CD8 TEM_4 | NCR3    |
| CD8 TEM_4 | CD7     |
| CD8 TEM_4 | IER2    |
| CD8 TEM_4 | PABPC1  |
| CD8 TEM_4 | BEX4    |
| CD8 TEM_4 | RALGPS2 |
| CD8 TEM_4 | FXD2    |
| CD8 TEM_4 | AREG    |
| CD8 TEM_4 | MAP3K1  |
| CD8 TEM_4 | JUNB    |
| CD8 TEM_4 | NCF1    |
| CD8 TEM_4 | BTG2    |
| CD8 TEM_4 | LYAR    |
| CD8 TEM_4 | NUCB2   |
| CD8 TEM_4 | ZNF683  |
| CD8 TEM_4 | DUSP2   |
| CD8 TEM_4 | LEF1    |
| CD8 TEM_4 | BEX2    |
| CD8 TEM_4 | LTB     |
| CD8 TEM_4 | DUSP1   |
| CD8 TEM_4 | SOCS3   |
| CD8 TEM_4 | XCL1    |
| CD8 TEM_4 | GADD45A |
| CD8 TEM_5 | KIR3DL1 |
| CD8 TEM_5 | GNLY    |
| CD8 TEM_5 | EFHD2   |
| CD8 TEM_5 | KIR2DL1 |
| CD8 TEM_5 | NKG7    |
| CD8 TEM_5 | B2M     |
| CD8 TEM_5 | GZMB    |
| CD8 TEM_5 | PRF1    |

|           |            |
|-----------|------------|
| CD8 TEM_5 | IFITM2     |
| CD8 TEM_5 | GZMH       |
| CD8 TEM_5 | TBX21      |
| CD8 TEM_5 | ZEB2       |
| CD8 TEM_5 | CYBA       |
| CD8 TEM_5 | CD63       |
| CD8 TEM_5 | SYNE1      |
| CD8 TEM_5 | KLRD1      |
| CD8 TEM_5 | S1PR5      |
| CD8 TEM_5 | CTSW       |
| CD8 TEM_5 | FCGR3A     |
| CD8 TEM_5 | FGFBP2     |
| CD8 TEM_5 | IKZF2      |
| CD8 TEM_5 | KLRC2      |
| CD8 TEM_5 | CCL5       |
| CD8 TEM_5 | MYO1F      |
| CD8 TEM_5 | CAST       |
| CD8 TEM_5 | KANSL1     |
| CD8 TEM_5 | PRSS23     |
| CD8 TEM_5 | ABHD17A    |
| CD8 TEM_5 | C1orf21    |
| CD8 TEM_5 | ASCL2      |
| CD8 TEM_5 | RAB14      |
| CD8 TEM_5 | SUPT16H    |
| CD8 TEM_5 | UBLCP1     |
| CD8 TEM_5 | NKG7       |
| CD8 TEM_5 | ARPC2      |
| CD8 TEM_5 | CYCS       |
| CD8 TEM_5 | IL2RG      |
| CD8 TEM_5 | TRBC1      |
| CD8 TEM_5 | PPP1CA     |
| CD8 TEM_5 | APOL6      |
| CD8 TEM_5 | COX6B1     |
| CD8 TEM_5 | PET100     |
| CD8 TEM_5 | CSGALNACT2 |
| CD8 TEM_6 | NELL2      |
| CD8 TEM_6 | IL7R       |
| CD8 TEM_6 | GPR183     |
| CD8 TEM_6 | PASK       |
| CD8 TEM_6 | FOXP1      |
| CD8 TEM_6 | CCR7       |
| CD8 TEM_6 | JUNB       |
| CD8 TEM_6 | TCF7       |

|           |         |
|-----------|---------|
| CD8 TEM_6 | RPS23   |
| CD8 TEM_6 | RCAN3   |
| VI-A      | GMFG    |
| VI-A      | CD27    |
| VI-A      | ACTG1   |
| VI-A      | LIMD2   |
| VI-A      | CD74    |
| VI-A      | ARHGDIB |
| VI-A      | GZMA    |
| VI-A      | COTL1   |
| VI-A      | ATP5F1A |
| VI-A      | ARPC3   |
| VI-A      | HLA-DRA |
| VI-A      | SUB1    |
| VI-A      | CORO1A  |
| VI-A      | RTRAF   |
| VI-A      | WDR1    |
| VI-A      | ATP5MC2 |
| VI-A      | ACTB    |
| VI-A      | PSMB8   |
| VI-A      | CNN2    |
| VI-A      | ATP5MG  |
| VI-A      | HIGD2A  |
| VI-A      | PSMA5   |
| VI-A      | TMSB4X  |
| VI-A      | PYCARD  |
| VI-A      | MYL6    |
| VI-A      | ARPC1B  |
| VI-A      | HINT1   |
| VI-A      | CCL5    |
| VI-A      | ACTR3   |
| VI-A      | PSMA4   |
| VI-B      | PKMYT1  |
| VI-B      | E2F7    |
| VI-B      | SPC25   |
| VI-B      | CCNB2   |
| VI-B      | CDC45   |
| VI-B      | FAM111B |
| VI-B      | MYBL2   |
| VI-B      | DTL     |
| VI-B      | CLSPN   |
| VI-B      | MND1    |
| VI-B      | TYMS    |



|                  |          |
|------------------|----------|
| VI-B             | CDK1     |
| VI-B             | DLGAP5   |
| VI-B             | CDCA5    |
| VI-B             | CDC6     |
| VI-B             | HIST1H3G |
| VI-B             | TK1      |
| VI-B             | CKAP2L   |
| VI-B             | ASF1B    |
| VI-B             | CDT1     |
| VI-B             | MKI67    |
| VI-B             | CENPF    |
| VI-B             | ZWINT    |
| VI-B             | PCLAF    |
| VI-B             | KNL1     |
| VI-B             | RRM2     |
| VI-B             | CENPU    |
| VI-B             | PBK      |
| VI-B             | MCM10    |
| VI-B             | CEP55    |
| NK Proliferating | TK1      |
| NK Proliferating | CDK1     |
| NK Proliferating | ESCO2    |
| NK Proliferating | SPC25    |
| NK Proliferating | E2F7     |
| NK Proliferating | DTL      |
| NK Proliferating | TYMS     |
| NK Proliferating | E2F1     |
| NK Proliferating | FAM111B  |
| NK Proliferating | UHRF1    |
| NK Proliferating | CDT1     |
| NK Proliferating | PCLAF    |
| NK Proliferating | HJURP    |
| NK Proliferating | CHEK1    |
| NK Proliferating | DIAPH3   |
| NK Proliferating | POLQ     |
| NK Proliferating | CLSPN    |
| NK Proliferating | ZWINT    |
| NK Proliferating | RRM2     |
| NK Proliferating | KIF11    |
| NK Proliferating | CKAP2L   |
| NK Proliferating | RAD51AP1 |
| NK Proliferating | MCM4     |
| NK Proliferating | HELLS    |

|                  |          |
|------------------|----------|
| NK Proliferating | MCM10    |
| NK Proliferating | PCNA     |
| NK Proliferating | CKS1B    |
| NK Proliferating | STMN1    |
| NK Proliferating | DUT      |
| NK Proliferating | HMGB2    |
| NK_0             | CCL5     |
| NK_0             | PPP2R5C  |
| NK_0             | ZEB2     |
| NK_0             | F2R      |
| NK_0             | AHNAK    |
| NK_0             | LAG3     |
| NK_0             | GZMH     |
| NK_0             | PATL2    |
| NK_0             | KLF12    |
| NK_0             | CDC42SE2 |
| NK_0             | TGFBR3   |
| NK_0             | SYNE2    |
| NK_0             | DDX24    |
| NK_0             | EPS15    |
| NK_0             | PTPRC    |
| NK_0             | MYH9     |
| NK_0             | DDX6     |
| NK_0             | SUN2     |
| NK_0             | RPS27    |
| NK_0             | PTMS     |
| NK_0             | ARID5B   |
| NK_0             | IL32     |
| NK_0             | CD3G     |
| NK_0             | FLNA     |
| NK_0             | ITGB1    |
| NK_0             | HERC1    |
| NK_0             | PRDM1    |
| NK_0             | S100A6   |
| NK_0             | TGFBR1   |
| NK_0             | CCDC88C  |
| NK_1             | KLRB1    |
| NK_1             | ITGA6    |
| NK_1             | CLIC3    |
| NK_1             | CD160    |
| NK_1             | CEBPD    |
| NK_1             | HELZ     |
| NK_1             | GSAP     |

|      |         |
|------|---------|
| NK_1 | EIF3G   |
| NK_1 | IFNGR1  |
| NK_1 | ARHGAP9 |
| NK_1 | JAK1    |
| NK_1 | HSH2D   |
| NK_1 | PRKCH   |
| NK_1 | KLRF1   |
| NK_1 | MYBL1   |
| NK_1 | GZMM    |
| NK_1 | TIGIT   |
| NK_1 | ZFP36   |
| NK_1 | JUNB    |
| NK_1 | CMC1    |
| NK_1 | TLE1    |
| NK_1 | SH2D2A  |
| NK_1 | SIRT2   |
| NK_1 | TENT5C  |
| NK_1 | IL2RB   |
| NK_1 | BTG2    |
| NK_1 | IRS2    |
| NK_1 | TRIM22  |
| NK_1 | PTPN12  |
| NK_1 | B3GNT7  |
| NK_2 | FGFBP2  |
| NK_2 | PTPRA   |
| NK_2 | S1PR5   |
| NK_2 | GNPTAB  |
| NK_2 | FCRL6   |
| NK_2 | KIR2DL3 |
| NK_2 | NKG7    |
| NK_2 | PTGDS   |
| NK_2 | MAF     |
| NK_2 | ITGB7   |
| NK_2 | CEBPB   |
| NK_2 | MTSS1   |
| NK_2 | RAPGEF1 |
| NK_2 | CST7    |
| NK_2 | KIR3DL1 |
| NK_2 | S100A4  |
| NK_2 | S100A6  |
| NK_2 | GZMH    |
| NK_2 | ZEB2    |
| NK_2 | PRSS23  |

|               |         |
|---------------|---------|
| NK_2          | KIR2DL3 |
| NK_2          | DSTN    |
| NK_2          | RAPGEF1 |
| NK_2          | KIR2DL1 |
| NK_2          | RAP2A   |
| NK_2          | LGALS1  |
| NK_2          | SCP2    |
| NK_2          | IL32    |
| NK_2          | CCL5    |
| NK_2          | FCRL6   |
| NK_3          | KIR2DL1 |
| NK_3          | FGFBP2  |
| NK_3          | PRSS23  |
| NK_3          | HIPK2   |
| NK_3          | FCGR3A  |
| NK_3          | PSAP    |
| NK_3          | NKG7    |
| NK_3          | SPON2   |
| NK_3          | ADGRG1  |
| NK_3          | CST7    |
| NK_3          | KIR3DL2 |
| NK_3          | HAVCR2  |
| NK_3          | CHST2   |
| NK_3          | PRF1    |
| NK_3          | RASSF4  |
| NK_3          | RABAC1  |
| NK_3          | GZMB    |
| NK_3          | ARPC2   |
| NK_3          | TMEM71  |
| NK_3          | TYROBP  |
| NK_3          | PREX1   |
| NK_3          | MTSS1   |
| NK_3          | ITK     |
| NK_3          | FCRL6   |
| NK_3          | SH2D2A  |
| NK_3          | GZMM    |
| NK_3          | PXN     |
| NK_3          | PTGDS   |
| NK_3          | IGF2R   |
| NK_3          | PTPN12  |
| NK_CD56bright | KIT     |
| NK_CD56bright | PACSIN1 |
| NK_CD56bright | IGFBP4  |

|               |           |
|---------------|-----------|
| NK_CD56bright | SPINK2    |
| NK_CD56bright | SPTSSB    |
| NK_CD56bright | AFF3      |
| NK_CD56bright | TNFRSF11A |
| NK_CD56bright | MAML3     |
| NK_CD56bright | PPP1R9A   |
| NK_CD56bright | GAB1      |
| NK_CD56bright | RUNX2     |
| NK_CD56bright | XCL1      |
| NK_CD56bright | HAPLN3    |
| NK_CD56bright | GPR183    |
| NK_CD56bright | SELL      |
| NK_CD56bright | TPT1      |
| NK_CD56bright | CMC1      |
| NK_CD56bright | CAPG      |
| NK_CD56bright | IL7R      |
| NK_CD56bright | IL18      |
| NK_CD56bright | GZMK      |
| HSPC          | SMIM24    |
| HSPC          | DDAH2     |
| HSPC          | ARMH1     |
| HSPC          | BCL11A    |
| HSPC          | PRSS57    |
| HSPC          | CYTL1     |
| HSPC          | DPPA4     |
| HSPC          | SPINK2    |
| HSPC          | SOX4      |
| HSPC          | LAPTM4B   |
| HSPC          | HACD1     |
| HSPC          | CD74      |
| HSPC          | STMN1     |
| HSPC          | HLA-DRB1  |
| HSPC          | CD34      |
| HSPC          | NPR3      |
| HSPC          | GATA2     |
| HSPC          | MYB       |
| HSPC          | BAALC     |
| HSPC          | RAB34     |
| HSPC          | LMO2      |
| HSPC          | IL18      |
| HSPC          | RPS24     |
| HSPC          | MYL6B     |
| HSPC          | AIF1      |

|          |          |
|----------|----------|
| HSPC     | EREG     |
| HSPC     | HLA-DRA  |
| HSPC     | TXN      |
| HSPC     | ALDH1A1  |
| HSPC     | MGST2    |
| ILC      | IL32     |
| ILC      | KLRB1    |
| ILC      | TXNIP    |
| ILC      | CD48     |
| ILC      | GATA3    |
| ILC      | S100A4   |
| ILC      | NCR3     |
| ILC      | LTB      |
| ILC      | NFKBIA   |
| ILC      | BTG1     |
| ILC      | TRDC     |
| ILC      | IL7R     |
| ILC      | FXYD7    |
| ILC      | CD69     |
| ILC      | CD52     |
| ILC      | IFITM2   |
| ILC      | CD7      |
| ILC      | JUNB     |
| ILC      | S100A6   |
| ILC      | RPLP2    |
| ILC      | FAM107B  |
| ILC      | TNFRSF25 |
| ILC      | IL2RA    |
| ILC      | IER2     |
| ILC      | ETS1     |
| ILC      | XCL1     |
| ILC      | FXYD1    |
| ILC      | RORA     |
| ILC      | MAF      |
| ILC      | EMP3     |
| Platelet | PF4      |
| Platelet | TUBB1    |
| Platelet | TREML1   |
| Platelet | TMEM40   |
| Platelet | PF4V1    |
| Platelet | CTTN     |
| Platelet | CLEC1B   |
| Platelet | PPBP     |

|          |          |
|----------|----------|
| Platelet | GP9      |
| Platelet | F13A1    |
| Platelet | CMTM5    |
| Platelet | GNAZ     |
| Platelet | NRGN     |
| Platelet | PTCRA    |
| Platelet | MYL9     |
| Platelet | CLDN5    |
| Platelet | SELP     |
| Platelet | MPIG6B   |
| Platelet | CD9      |
| Platelet | CA2      |
| Platelet | ITGB3    |
| Platelet | BEND2    |
| Platelet | ABCC3    |
| Platelet | MFAP3L   |
| Platelet | OSBP2    |
| Platelet | CAVIN2   |
| Platelet | SMOX     |
| Platelet | GNG11    |
| Platelet | SH3BGRL2 |
| Platelet | ACRBP    |
| dnT      | COTL1    |
| dnT      | ACTG1    |
| dnT      | F5       |
| dnT      | SMCO4    |
| dnT      | LYST     |
| dnT      | ACTB     |
| dnT      | GPR183   |
| dnT      | SESTD1   |
| dnT      | LAYN     |
| dnT      | FXD2     |
| dnT      | MYB      |
| dnT      | CD68     |
| dnT      | TIMD4    |
| dnT      | PGM2L1   |
| dnT      | HLA-DRA  |
| dnT      | CAPG     |
| dnT      | EVI2B    |
| dnT      | PSMB8    |
| dnT      | CD27     |
| dnT      | POU2F2   |
| dnT      | SAT1     |

|       |           |
|-------|-----------|
| dnT   | AIF1      |
| dnT   | DENND2D   |
| dnT   | RGS10     |
| dnT   | PCBP1     |
| dnT   | DUSP6     |
| dnT   | CD74      |
| dnT   | CALM3     |
| dnT   | FYB1      |
| dnT   | CTLA4     |
| gdT_0 | TRDV2     |
| gdT_0 | KLRC1     |
| gdT_0 | TRGC1     |
| gdT_0 | DUSP2     |
| gdT_0 | XCL2      |
| gdT_0 | CD160     |
| gdT_0 | TRGV9     |
| gdT_0 | MAP3K8    |
| gdT_0 | IL18RAP   |
| gdT_0 | KLRG1     |
| gdT_0 | PIK3R1    |
| gdT_0 | TC2N      |
| gdT_0 | CD300A    |
| gdT_0 | CD69      |
| gdT_0 | TNFAIP3   |
| gdT_0 | KLRB1     |
| gdT_0 | FKBP11    |
| gdT_0 | PDE4B     |
| gdT_0 | TLE1      |
| gdT_0 | TENT5C    |
| gdT_0 | TGFBR3    |
| gdT_0 | GABARAPL1 |
| gdT_0 | TBX21     |
| gdT_0 | TRDC      |
| gdT_0 | ALOX5AP   |
| gdT_0 | CCL4      |
| gdT_0 | RORA      |
| gdT_0 | IFNGR1    |
| gdT_0 | SYTL2     |
| gdT_0 | CEBPD     |
| gdT_1 | ADGRG1    |
| gdT_1 | GZMH      |
| gdT_1 | CLIC3     |
| gdT_1 | PLAAT3    |



|       |          |
|-------|----------|
| gdT_1 | SERPINB6 |
| gdT_1 | ZEB2     |
| gdT_1 | NKG7     |
| gdT_1 | CYBA     |
| gdT_1 | SSBP3    |
| gdT_1 | GZMM     |
| gdT_1 | LILRB1   |
| gdT_1 | IFITM2   |
| gdT_1 | PRSS23   |
| gdT_1 | GZMB     |
| gdT_1 | PDGFD    |
| gdT_1 | FCRL6    |
| gdT_1 | EFHD2    |
| gdT_1 | PRF1     |
| gdT_1 | AHNAK    |
| gdT_1 | F2R      |
| gdT_1 | PDIA3    |
| gdT_1 | ITGB1    |
| gdT_1 | GNLY     |
| gdT_1 | CD320    |
| gdT_1 | CST7     |
| gdT_1 | DHRS7    |
| gdT_1 | ITGAL    |
| gdT_1 | FGFBP2   |
| gdT_1 | ABHD17A  |
| gdT_1 | CTSW     |
| gdT_2 | MME      |
| gdT_2 | RTKN2    |
| gdT_2 | SOX4     |
| gdT_2 | MAP3K1   |
| gdT_2 | MAL      |
| gdT_2 | LEF1     |
| gdT_2 | CDC14A   |
| gdT_2 | EPHA4    |
| gdT_2 | BEX3     |
| gdT_2 | ITGA6    |
| gdT_2 | CAMK4    |
| gdT_2 | TRABD2A  |
| gdT_2 | ITPKB    |
| gdT_2 | JUN      |
| gdT_2 | CR1      |
| gdT_2 | HSPB1    |
| gdT_2 | RCAN3    |

|       |            |
|-------|------------|
| gdT_2 | NUCB2      |
| gdT_2 | TCF7       |
| gdT_2 | IRF2BP2    |
| gdT_2 | CD79A      |
| gdT_2 | ATXN7L3B   |
| gdT_2 | SCML4      |
| gdT_2 | SPINT2     |
| gdT_2 | LEPROTL1   |
| gdT_2 | NELL2      |
| gdT_2 | SINHCAF    |
| gdT_2 | BCL11B     |
| gdT_2 | LTB        |
| gdT_2 | AC092338.1 |
| gdT_3 | FGFBP2     |
| gdT_3 | GNLY       |
| gdT_3 | EFHD2      |
| gdT_3 | NKG7       |
| gdT_3 | CST7       |
| gdT_3 | CCL5       |
| gdT_3 | GZMB       |
| gdT_3 | KIR3DL1    |
| gdT_3 | CD3G       |
| gdT_3 | PRSS23     |
| gdT_3 | IFITM2     |
| gdT_3 | TRDC       |
| gdT_3 | ZEB2       |
| gdT_3 | GZMH       |
| gdT_3 | CD247      |
| gdT_3 | CD99       |
| gdT_3 | ITGB2      |
| gdT_3 | KLRD1      |
| gdT_3 | FCGR3A     |
| gdT_3 | CALR       |
| gdT_3 | SPON2      |
| gdT_3 | CD63       |
| gdT_3 | HOPX       |
| gdT_3 | PRF1       |
| gdT_3 | ABHD17A    |
| gdT_3 | PYHIN1     |
| gdT_3 | LGALS1     |
| gdT_3 | C1orf21    |
| gdT_3 | DSTN       |
| gdT_3 | RASSF1     |

|                |          |
|----------------|----------|
| MAIT           | TSPAN15  |
| MAIT           | ADAM12   |
| MAIT           | LTK      |
| MAIT           | SCART1   |
| MAIT           | CCR6     |
| MAIT           | SLC4A10  |
| MAIT           | DPP4     |
| MAIT           | SPRY1    |
| MAIT           | COLQ     |
| MAIT           | KIF5C    |
| MAIT           | KLRB1    |
| MAIT           | CD8A     |
| MAIT           | NCR3     |
| MAIT           | TMIGD2   |
| MAIT           | IL7R     |
| MAIT           | NFKBIA   |
| MAIT           | PHACTR2  |
| MAIT           | MAF      |
| MAIT           | ZBTB16   |
| MAIT           | SLAMF1   |
| MAIT           | PLXND1   |
| MAIT           | APOL3    |
| MAIT           | GPR171   |
| MAIT           | AQP3     |
| MAIT           | TLE1     |
| MAIT           | RORA     |
| MAIT           | TNFRSF25 |
| MAIT           | HSP90AB1 |
| MAIT           | IL18RAP  |
| MAIT           | NR1D1    |
| B Intermediate | CIB1     |
| B Intermediate | HSPB1    |
| B Intermediate | LRRK2    |
| B Intermediate | SOX5     |
| B Intermediate | TFEC     |
| B Intermediate | CD1C     |
| B Intermediate | GPR183   |
| B Intermediate | SYK      |
| B Intermediate | PARP15   |
| B Intermediate | FCRL2    |
| B Intermediate | CCDC50   |
| B Intermediate | MPP6     |
| B Intermediate | ZEB2     |

|                |          |
|----------------|----------|
| B Intermediate | MPEG1    |
| B Intermediate | RALGPS2  |
| B Intermediate | PTPRJ    |
| B Intermediate | ARHGAP24 |
| B Intermediate | IL10RA   |
| B Intermediate | CNFN     |
| B Intermediate | EMP3     |
| B Intermediate | HCK      |
| B Intermediate | RIN3     |
| B Intermediate | ARF6     |
| B Intermediate | ENC1     |
| B Intermediate | ZDHHC21  |
| B Intermediate | FGR      |
| B Intermediate | TNFRSF1B |
| B Intermediate | ITGAX    |
| B Intermediate | ZFP36    |
| B Intermediate | AKAP13   |
| B Memory       | SHISA8   |
| B Memory       | LYPLAL1  |
| B Memory       | DAAM1    |
| B Memory       | NAP1L1   |
| B Memory       | CRIP2    |
| B Memory       | COCH     |
| B Memory       | TEX9     |
| B Memory       | SCIMP    |
| B Memory       | SINHCAF  |
| B Memory       | GSTK1    |
| B Memory       | TCF7     |
| B Memory       | BLK      |
| B Memory       | S100A10  |
| B Memory       | MARCKS   |
| B Memory       | PLP2     |
| B Memory       | LTB      |
| B Memory       | ARID5B   |
| B Memory       | NFKBIA   |
| B Memory       | CR1      |
| B Memory       | AIM2     |
| B Memory       | SSPN     |
| B Memory       | HOPX     |
| B Memory       | RILPL2   |
| B Memory       | NCOA7    |
| B Memory       | CD82     |
| B Memory       | CAPG     |

|             |         |
|-------------|---------|
| B Memory    | PIM3    |
| B Memory    | ANXA4   |
| B Memory    | CPNE5   |
| B Memory    | AHNAK   |
| B Naive     | TCL1A   |
| B Naive     | CD200   |
| B Naive     | IGHD    |
| B Naive     | IL4R    |
| B Naive     | BACH2   |
| B Naive     | COL19A1 |
| B Naive     | TSPAN13 |
| B Naive     | CD69    |
| B Naive     | BIRC3   |
| B Naive     | ITPR1   |
| B Naive     | NCK2    |
| B Naive     | CXCR4   |
| B Naive     | YBX3    |
| B Naive     | TCTN1   |
| B Naive     | SESTD1  |
| B Naive     | FCRL1   |
| B Naive     | TAPT1   |
| B Naive     | STK17A  |
| B Naive     | PLEKHA1 |
| B Naive     | FCER2   |
| B Naive     | BCL7A   |
| B Naive     | BTG1    |
| B Naive     | ATF7IP  |
| B Naive     | PLEKHA2 |
| B Naive     | AFF3    |
| B Naive     | CD37    |
| B Naive     | PNRC1   |
| B Naive     | APLP2   |
| B Naive     | MEF2C   |
| B Naive     | CCR7    |
| Plasmablast | MZB1    |
| Plasmablast | JCHAIN  |
| Plasmablast | SEC11C  |
| Plasmablast | SDF2L1  |
| Plasmablast | PPIB    |
| Plasmablast | PRDX4   |
| Plasmablast | OSTC    |
| Plasmablast | SEC61B  |
| Plasmablast | SSR4    |

|             |          |
|-------------|----------|
| Plasmablast | TMED9    |
| Plasmablast | ERLEC1   |
| Plasmablast | SPCS2    |
| Plasmablast | SPCS1    |
| Plasmablast | SUB1     |
| Plasmablast | CLPTM1L  |
| Plasmablast | TMBIM6   |
| Plasmablast | SSR1     |
| Plasmablast | SELENOS  |
| Plasmablast | TRAM1    |
| Plasmablast | PRDX5    |
| Plasmablast | MYDGF    |
| Plasmablast | P4HB     |
| Plasmablast | LMAN2    |
| Plasmablast | SRGN     |
| Plasmablast | UBE2J1   |
| Plasmablast | PDIA6    |
| Plasmablast | RABAC1   |
| Plasmablast | TMEM208  |
| Plasmablast | PRDX1    |
| Plasmablast | TMEM258  |
| ASDC        | SIGLEC6  |
| ASDC        | AXL      |
| ASDC        | LTK      |
| ASDC        | PPP1R14A |
| ASDC        | OTULINL  |
| ASDC        | APEX1    |
| ASDC        | S100A10  |
| ASDC        | CALM1    |
| ASDC        | UPK3A    |
| ASDC        | MYL12A   |
| ASDC        | FCGRT    |
| ASDC        | SCT      |
| ASDC        | HINT1    |
| ASDC        | PTPRE    |
| ASDC        | DAB2     |
| ASDC        | SOX4     |
| ASDC        | ALDH2    |
| ASDC        | ANXA2    |
| ASDC        | CCND3    |
| ASDC        | TNNI2    |
| ASDC        | VASH1    |
| ASDC        | KIF2A    |

|           |           |
|-----------|-----------|
| ASDC      | C20orf27  |
| ASDC      | PHB       |
| ASDC      | LGMN      |
| ASDC      | SNRNP25   |
| ASDC      | SULF2     |
| ASDC      | RAB11FIP1 |
| ASDC      | DPYSL2    |
| CD14 Mono | STEAP4    |
| CD14 Mono | S1PR3     |
| CD14 Mono | CLEC4D    |
| CD14 Mono | MCEMP1    |
| CD14 Mono | CRISPLD2  |
| CD14 Mono | F5        |
| CD14 Mono | CYP27A1   |
| CD14 Mono | PROK2     |
| CD14 Mono | DYSF      |
| CD14 Mono | AQP9      |
| CD14 Mono | ALDH1A1   |
| CD14 Mono | CYP1B1    |
| CD14 Mono | PLA2G7    |
| CD14 Mono | DSC2      |
| CD14 Mono | NRG1      |
| CD14 Mono | CATSPER1  |
| CD14 Mono | HOMER3    |
| CD14 Mono | CD163     |
| CD14 Mono | RBP7      |
| CD14 Mono | HPSE      |
| CD14 Mono | FCAR      |
| CD14 Mono | THBS1     |
| CD14 Mono | NLRP12    |
| CD14 Mono | CLEC4E    |
| CD14 Mono | CDA       |
| CD14 Mono | CR1       |
| CD14 Mono | NRGN      |
| CD14 Mono | VNN2      |
| CD14 Mono | STAB1     |
| CD14 Mono | PLPPR2    |
| CD16 Mono | LYPD2     |
| CD16 Mono | PPP1R17   |
| CD16 Mono | CASP5     |
| CD16 Mono | IGFBP6    |
| CD16 Mono | L1TD1     |
| CD16 Mono | CEACAM3   |

|           |          |
|-----------|----------|
| CD16 Mono | TNFRSF8  |
| CD16 Mono | TMTC1    |
| CD16 Mono | ABCC3    |
| CD16 Mono | CTSL     |
| CD16 Mono | C1QB     |
| CD16 Mono | C5AR2    |
| CD16 Mono | C1QA     |
| CD16 Mono | CDKN1C   |
| CD16 Mono | HES4     |
| CD16 Mono | CHST7    |
| CD16 Mono | HEG1     |
| CD16 Mono | ADGRE1   |
| CD16 Mono | FCGR3A   |
| CD16 Mono | VMO1     |
| CD16 Mono | MRAS     |
| CD16 Mono | PPM1N    |
| CD16 Mono | KCNMA1   |
| CD16 Mono | SPRED1   |
| CD16 Mono | NEURL1   |
| CD16 Mono | MSR1     |
| CD16 Mono | TCF7L2   |
| CD16 Mono | MTSS1    |
| CD16 Mono | TESC     |
| CD16 Mono | CKB      |
| cDC1      | CADM1    |
| cDC1      | CLEC9A   |
| cDC1      | CPNE3    |
| cDC1      | SNX3     |
| cDC1      | CLNK     |
| cDC1      | GSTP1    |
| cDC1      | ENPP1    |
| cDC1      | MZT2A    |
| cDC1      | CPVL     |
| cDC1      | RGS10    |
| cDC1      | CD74     |
| cDC1      | HLA-DPA1 |
| cDC1      | GYPC     |
| cDC1      | HLA-DPB1 |
| cDC1      | HLA-DRA  |
| cDC1      | BATF3    |
| cDC1      | HLA-DQB1 |
| cDC1      | C1orf54  |
| cDC1      | BASP1    |



|      |          |
|------|----------|
| cDC1 | SUB1     |
| cDC1 | CST3     |
| cDC1 | WDFY4    |
| cDC1 | MCUR1    |
| cDC1 | HLA-DOB  |
| cDC1 | NDUFV2   |
| cDC1 | RAB32    |
| cDC1 | CYB5R3   |
| cDC1 | FNBP1    |
| cDC1 | HDAC9    |
| cDC1 | HLA-DQA1 |
| cDC2 | CD1E     |
| cDC2 | IL1R2    |
| cDC2 | CD1C     |
| cDC2 | FCGR2B   |
| cDC2 | ID3      |
| cDC2 | FCER1A   |
| cDC2 | RTN1     |
| cDC2 | CACNA2D3 |
| cDC2 | CLEC10A  |
| cDC2 | PKIB     |
| cDC2 | ENHO     |
| cDC2 | TMEM273  |
| cDC2 | LMNA     |
| cDC2 | GPAT3    |
| cDC2 | PID1     |
| cDC2 | CCND2    |
| cDC2 | CST7     |
| cDC2 | ID1      |
| cDC2 | IL13RA1  |
| cDC2 | CD33     |
| cDC2 | IL18     |
| cDC2 | ATP1B1   |
| cDC2 | RCC2     |
| cDC2 | FAM102B  |
| cDC2 | TOB1     |
| cDC2 | F13A1    |
| cDC2 | LY86     |
| cDC2 | MAT2A    |
| cDC2 | EMP1     |
| cDC2 | VEGFA    |
| pDC  | COL26A1  |
| pDC  | SHD      |

|     |         |
|-----|---------|
| pDC | CRYM    |
| pDC | ASIP    |
| pDC | CYP46A1 |
| pDC | AJAP1   |
| pDC | LRRC26  |
| pDC | SLC12A3 |
| pDC | KRT5    |
| pDC | PACSIN1 |
| pDC | CUX2    |
| pDC | TTC24   |
| pDC | MAP1A   |
| pDC | SLITRK5 |
| pDC | TTC39A  |
| pDC | PTCRA   |
| pDC | RBMS3   |
| pDC | CHPF    |
| pDC | WNT10A  |
| pDC | TCL1A   |
| pDC | AEBP1   |
| pDC | DPPA4   |
| pDC | LCNL1   |
| pDC | MYBL2   |
| pDC | AR      |
| pDC | PTPRS   |
| pDC | CYR1    |
| pDC | PALD1   |
| pDC | EPHA2   |
| pDC | PHEX    |
